# Supplementary material for: Genome-Wide Identification of Papain-Like Cysteine Proteases in Gossypium hirsutum and Functional Characterization in Response to Verticillium dahliae
Source: Front Plant Sci. 2019 Feb 20;10:134. doi: 10.3389/fpls.2019.00134 (PMC6391353; doi:10.3389/fpls.2019.00134)
Supplement: Supplementary file 2 [file Data_Sheet_2.xlsx]

## Sheet: Supplementary table 1
Supplementary Table1 Primers used in this study
Primer	Sequence
GhUBQ7(S)	GAAGGCATTCCACCTGACCAAC
GhUBQ7(A)	CTTGACCTTCTTCTTCTTGTGCTTG
GhRD21-7(S)	AGGATGGCAAGGAATGTGGC
GhRD21-7(A)	GAGGTTTTATAGGAGATGGTGGAGAC

## Sheet: Supplementary table 2
Supplementary Table 2 Nomenclature of PLCPs family in upland cotton.
Number	GeneID	Nomenclature
1	Gh_A01G0993	GhRD21-1
2	Gh_A03G1649	GhRD21-2
3	Gh_A05G1776	GhRD21-3
4	Gh_A06G0180	GhRD21-4
5	Gh_A11G1803	GhRD21-5
6	Gh_A12G0676	GhRD21-6
7	Gh_D01G1044	GhRD21-7
8	Gh_D02G2065	GhRD21-8
9	Gh_D05G1970	GhRD21-9
10	Gh_D11G1967	GhRD21-10
11	Gh_D06G0176	GhRD21-11
12	Gh_D12G0678	GhRD21-12
13	Gh_A03G0561	GhCEP1
14	Gh_D12G1470	GhCEP2
15	Gh_A12G1345	GhCEP3
16	Gh_A12G1694	GhCEP4
17	Gh_D03G0970	GhCEP5
18	Gh_D12G1855	GhCEP6
19	Gh_A04G1431	GhXCP1
20	Gh_A12G0107	GhXCP2
21	Gh_D04G1484	GhXCP3
22	Gh_D12G0119	GhXCP4
23	Gh_D06G1437	GhXBCP3-1
24	Gh_A05G1625	GhXBCP3-2
25	Gh_A06G1157	GhXBCP3-3
26	Gh_D05G1809	GhXBCP3-4
27	Gh_A05G3227	GhTHI1
28	Gh_D04G0379	GhTHI2
29	Gh_A04G0365	GhSAG12-1
30	Gh_A04G0366	GhSAG12-2
31	Gh_A04G0367	GhSAG12-3
32	Gh_A05G1308	GhSAG12-4
33	Gh_A05G1309	GhSAG12-5
34	Gh_A05G3261	GhSAG12-6
35	Gh_A05G3262	GhSAG12-7
36	Gh_A05G3263	GhSAG12-8
37	Gh_A05G3686	GhSAG12-9
38	Gh_A06G1173	GhSAG12-10
39	Gh_A10G0293	GhSAG12-11
40	Gh_A10G0294	GhSAG12-12
41	Gh_D04G0345	GhSAG12-13
42	Gh_D04G0346	GhSAG12-14
43	Gh_D04G0347	GhSAG12-15
44	Gh_D04G0348	GhSAG12-16
45	Gh_D04G0349	GhSAG12-17
46	Gh_D05G3269	GhSAG12-18
47	Gh_D05G3271	GhSAG12-19
48	Gh_D05G3272	GhSAG12-20
49	Gh_D05G3275	GhSAG12-21
50	Gh_D05G3276	GhSAG12-22
51	Gh_D05G3277	GhSAG12-23
52	Gh_D05G3278	GhSAG12-24
53	Gh_D05G3279	GhSAG12-25
54	Gh_D05G1479	GhSAG12-26
55	Gh_D10G0296	GhSAG12-27
56	Gh_A05G3260	GhSAG12-28
57	Gh_Sca004834G01	GhSAG12-29
58	Gh_Sca010764G01	GhSAG12-30
59	Gh_A13G0288	GhRD19-1
60	Gh_A07G0161	GhRD19-2
61	Gh_D02G0964	GhRD19-3
62	Gh_D02G2178	GhRD19-4
63	Gh_A03G1744	GhRD19-5
64	Gh_D05G1804	GhRD19-6
65	Gh_A10G1809	GhRD19-7
66	Gh_D07G0218	GhRD19-8
67	Gh_D10G2074	GhRD19-9
68	Gh_D13G0307	GhRD19-10
69	Gh_D13G2489	GhALP1
70	Gh_A06G0687	GhALP2
71	Gh_D05G0344	GhALP3
72	Gh_A05G0252	GhALP4
73	Gh_D06G0788	GhALP5
74	Gh_A13G1686	GhALP6
75	Gh_A11G0437	GhCTB1
76	Gh_A11G0940	GhCTB2
77	Gh_D11G0509	GhCTB3
78	Gh_D11G1083	GhCTB4

## Sheet: Supplementary table  3
	Supplementary Table 3 Upland Cotton PLCPs family properties
	Name	protein
Number	G. hirsutum	Length(A.A)	Mw	Pi
1	GhRD21-1	457	50544.9	5.12
2	GhRD21-2	474	52552.4	6.04
3	GhRD21-3	467	51587.9	5.28
4	GhRD21-4	460	51045.4	5.3
5	GhRD21-5	367	41176.7	5.02
6	GhRD21-6	375	41764.3	5.13
7	GhRD21-7	457	50587.8	4.97
8	GhRD21-8	606	67468.8	5.7
9	GhRD21-9	469	51859.2	5.28
10	GhRD21-10	367	40866.1	4.91
11	GhRD21-11	433	48257.9	4.77
12	GhRD21-12	372	41372.8	5.06
13	GhCEP1	361	40148.9	6.02
14	GhCEP2	327	37292.1	5.84
15	GhCEP3	326	37161.9	5.97
16	GhCEP4	363	40325.4	6.42
17	GhCEP5	361	40025.7	5.79
18	GhCEP6	363	40538.5	6.22
19	GhXCP1	352	39045.2	5.6
20	GhXCP2	412	46074.1	5.81
21	GhXCP3	352	39067.2	5.5
22	GhXCP4	412	46139.2	5.52
23	GhXBCP3-1	497	55425	4.8
24	GhXBCP3-2	431	48025.4	6.66
25	GhXBCP3-3	497	55364	4.69
26	GhXBCP3-4	431	47948.3	6.69
27	GhTHI1	342	38409.3	7.45
28	GhTHI2	597	66454.3	5.98
29	GhSAG12-1	316	35429.5	5.26
30	GhSAG12-2	293	32794.7	4.88
31	GhSAG12-3	337	37722.4	4.79
32	GhSAG12-4	340	37563.3	6.38
33	GhSAG12-5	341	37431.7	4.9
34	GhSAG12-6	306	33662.4	5.06
35	GhSAG12-7	384	37397.8	5.25
36	GhSAG12-8	344	38424.2	6.09
37	GhSAG12-9	342	37385.7	5.24
38	GhSAG12-10	278	31175.4	8.58
39	GhSAG12-11	342	37381.6	4.7
40	GhSAG12-12	304	33100.5	4.71
41	GhSAG12-13	342	37539.8	5.26
42	GhSAG12-14	342	37451.8	5.25
43	GhSAG12-15	342	37457.8	5.18
44	GhSAG12-16	342	37513.9	5.35
45	GhSAG12-17	342	37526.9	5.36
46	GhSAG12-18	324	36101.4	4.84
47	GhSAG12-19	342	38281	5.74
48	GhSAG12-20	338	37727.3	4.72
49	GhSAG12-21	335	37458	4.78
50	GhSAG12-22	300	33631.6	4.66
51	GhSAG12-23	337	37497.9	4.62
52	GhSAG12-24	338	37726.3	4.74
53	GhSAG12-25	336	37721.6	5.29
54	GhSAG12-26	341	37431.8	4.9
55	GhSAG12-27	342	37357.5	4.7
56	GhSAG12-28	342	37410.7	5.35
57	GhSAG12-29	342	37670.1	5.37
58	GhSAG12-30	334	37060.1	5.33
59	GhRD19-1	373	41352.6	5.58
60	GhRD19-2	377	41575.1	7.14
61	GhRD19-3	370	40475.5	5.63
62	GhRD19-4	374	41151.4	5.96
63	GhRD19-5	374	41213.5	5.96
64	GhRD19-6	393	43156.6	6.12
65	GhRD19-7	354	42412.5	6.08
66	GhRD19-8	377	41514	6.63
67	GhRD19-9	384	42489.6	5.84
68	GhRD19-10	373	41287.6	5.69
69	GhALP1	355	39119.2	6.32
70	GhALP2	355	38890	6.08
71	GhALP3	346	38005.8	6.08
72	GhALP4	352	38548.4	5.56
73	GhALP5	355	38779.9	6.71
74	GhALP6	355	38967.1	6.15
75	GhCTB1	358	39664.3	6.07
76	GhCTB2	357	39204	6.78
77	GhCTB3	354	39087.5	6.07
78	GhCTB4	354	38937.6	6.78

## Sheet: Supplementary table 4
Supplementary Table 4 Protein sequences of PLCPs in upland cotton used for phylogenetic tree construction
>GhRD21-1
MGSQGSVMAMLLLMMFTLSSASDMSIISYDEAHPDKSTSSWRTDDEVMAMYEEWLVKHGKTYNGLGEKERRLQIFKDNLRFIDEHNADESHSFKVGLNRFADLTNEEYRAIYLGIKKPNRKVSKASDRYAPLLGQKLPDSVDWREKGAVAEVKDQGSCGNCWAFSTIAAVEGINQIVTGELLSLSEQELVDCDTSYNEGCNGGLMDYAFEFIIKNGGIDTEEDYPYAARDGTCDPYRKNAKVVSINDYEDVPVNDEKALKKAVANQPVSVAIEAGGRSFQLYQSGIFDGKCGTQLDHGVTAVGYGTEKGKDYWIVKNSWGSSWGEAGYIRMARNVANTVTGKCGIAMEASYPIKTGENPPNPGPSPPSPIKPPTVCDSYYSCPESNTCCCIYEYYNYCF…
>GhRD21-2
MSLLKNPTHVIIFTMFLVTLSSALDMSIIDYDLNHVSQQPQRQTTDTQVRRLYETWLVKHGKAYNDLGEKEKRFDIFKDNLKFIVEHNSVNRMYKVGLNRFADMTNEEYKAMYLGTRVDPKTRLRRLAGKEKSNRYAYKVGDELPESVDWRQKGAVMDVKDQGQCGSCWAFSTVAAVEGINKIVTGDLISLSEQELVDCDNMYNQGCNGGLMDHAFEFIINNGGIDTEEDYPYRATDNTCDIDRKNARVVTIDGYEDVPENDENSLKKAIAHQPVSVAIEAGGRAFQLYQSGVFTGQCGTSLDHGVAAVGYGTEGGVDYFLVRNSWGPNWGENGYIKMERNVAGTSTGKCGIAMMASYPIKKGPNPPKPAPSPPSPVKPPTVCNEYYSCPQGSTCCCLY…
>GhRD21-3
MGLQRSTMAMLLLMMFTLSSALDMSIISYDEGHPDKSKSSWRTDDEVMVMYEEWLVKHGKAYNGLGEKERRFKIFKDNLRFIDEHNANESHSFKVGLNRFADLTNDEYRAMYLGTKKSSNKVSKKSNRYAPRVGEELPASIDWREKGAVVPVKDQGSCGTCWAFSTVGAVEGINQIVTGDLISLSEQELVDCDTSYNEGCNGGLMDYAFEFIIKNGGIDTEEDYPYTGHDGRCDSYRQKTAKVVTIDSYEDVPQNNEGALKKALASQPVSVAIEAGGRAFQLYASGIFNGLCGTQLDHGVVAVGYGTENGKDYWIVRNSWGNQWGEEGYIRMERNLANTATGKCGIAIEASYPIKNGQNPPNPGPSPPSPIKPPTVCDNYYSCPESNTCCCVYEYYGYC…
>GhRD21-4
MAVLLLMMFTLSSTFDMSIVSYDKSHPDRSMSSWRTFDEVMAMYEDWLVKHGKVYNGLGEKEKRFQIFKDNLRFIDEHNSEETHSFKLGLNQFADLTNEEYRFTYLGVKKPNKKVSKRSDRYVQLLGQAALPDSVDWRTKGAVAPVKDQGSCGSCWAFSTIAAVEGINKIITGDLIVLSEQELVDCDTSYNEGCNGGLMDYAFEFIIKNGGIDTEEDYPYTNHNGRCDTYRKNAKVVSIEAYENVPENDEGALKKAVSNQPVSVAIEAGGRAFQLYQSGIFDGQCGTQLDHGVTIVGYGTENGKDYWIVRNSWGDNWGEAGYVRMERNVVDTKTGKCGIAMEASYPIKTGRNPPNPSPSPPSPVKPPSVCDNYYSCPESNTSCCVFEQYGYCLAWVCCS…
>GhRD21-5
MATTVTPISTLFFLFFTLSWATSFSQNHWRSDDEVMSLYQAWLIKHGKQYNGIGEEENRFDIFKDNLKFIDQHNSKNTTYKLGLNKFADLTNQEYRSMFLGTKSDPKRRVMKSKNPSQRYASRAGDRLPESFDWRDHGAVTPVKDQGRCGSCWAFSTIAAVEGINKIATGELISLSEQELVDCDRSYDAGCDGGLMDYAFQFIIDNGGIDSEQDYPYLGADNNQCDPTRKNAKVVSIDGYEDVVQYDEKALKKAVSHQPVSVAIEASGRAFQLYESGVFSGECGSALDHGVIVIGYGMDENGQEYWTVRNSWGSGWGEDGYIRMERNVDDRAGKCGIAMEASYPVKNGTNIIKPYWTNEDTQKISSA
>GhRD21-6
MELTLLFPLFFFFTLSFATYISTLTLNQNHPSSSSSSSWRSDNEVMGLYKSWVIQHGKAYNGISEEEKRFEIFKDNLMFIDEHNSNNNTTYKLGLNKFADLTNQEYRAKFLGTRTDPRRRLMKSKIPSSRYAHRAGDNLPDSVNWRDHGAVSRVKDQGSCGDCWAFSAIAAVEGINKIVSGELISLSEQELVDCDRSYDAGCNGGLMDYAFQFIIDNGGIDTEKDYPYLGFNNQCDPTKKNAKVVSIDGYEDVPNNENALKKAVAHQPVSIAIEAGGRAFQLYESGVFNGECGLALDHGVVAVGYGSDDNGQDYWIVRNSWGSNWGENGYIRMERNINANTGKCGIAMEASYPVKNGANIIQPYYNESTENISSA
>GhRD21-7
MGSQGSVMAMLLLMMFTLSSASDMSIISYDETHPDKSTSSWRTDDEVMAMYEEWLVKHGKTYNGLGEKERRFQIFKDNLRFIDEHNADESQSFNVGLNRFADLTNEEYRAIYLGIKKPNRKVSKASDRYSALLGEKLPDSVDWREKGAVAEVKDQGSCGNCWAFSTIAAVEGINQIVTGELLSLSEQELVDCDTSYNEGCNGGLMDYAFEFIIKNGGIDTEEDYPYTAHDGTCDPYRKNAKVVSINDYEDVPVNDEKALKKAVANQPVSVAIEAGGRSFQLYQSGIFDGKCGTQLDHGVTAVGYGTEKGKDYWIVKNSWGSSWGEAGYIRMARNVANTVTGKCGIAMEASYPIKTGENPPNPGPSPPSPIKPPTVCDSYYSCPESNTCCCIYEYYNYCF…
>GhRD21-8
MSSSIMKSVAVGVEEWSDWMEDQRGYSLGGDEANERRWCGLSPLPSYNETVTDTNTTQVSVPLSTWFLSLLLLIFYCSLFSPINTHIIFIIVFIPLQTQSPKSQIMSLLKNPTHVIIFTMLLVTLSSALDMSIIDYDLNHVSQQPQRQTTNTQVRRLYETWLVKHGKAYNDLGEKEKRFDIFKDNLKFIVEHNSVNRTYKVGLNRFADMTNEEYKAMYLGTRVDPKTRLRRLAGKEKSNRYAYKVGDELPESVDWRQKGAVMDVKDQGQCGKDMVFDVFLFTCVCLWIVCMTLIMNVGSCWAFSTVAAVEGINKIVTGDLISLSEQELVDCDNMYNQGCNGGLMDHAFEFIINNGGIDTEEDYPYRATDNTCDINRKNARVVTIDGYEDVPENDENSLK…
>GhRD21-9
MGLQRSTMAMLLLMMFTLSSALDMSIISYDEGHPDKSKSKSSWRTDDEVMVMYEEWLVKHGKAYNGLGEKERRFKIFKDNLRFIDEHNVDESHSFKVGLNRFADLTNDEYRAMYLGTKKSSNKVSKKSNRYAPRVGEELPASIDWREKGAVVPVKDQGSCGTCWAFSTVGAVEGINQIVTGDLISLSEQELVDCDTSYNEGCNGGLMDYAFEFIIKNGGIDTEEDYPYTGHDGRCDSYRQKTAKVVTIDSYEDVPQNNEGALKKALANQPVSVAIEAGGRAFQLYASGIFNGICGTQLDHGVVAVGYGTENGKDYWIVRNSWGNQWGEEGYIRMERNLANTATGKCGIAIEASYPIKNGQNPPNPGPSPPSPIKPPTVCDNYYSCPESNTCCCVYEYYG…
>GhRD21-10
MTTTVTPISTLFFLFFTLSSATSFSQNHWRSDDEVMSLYQAWLVKHGKQYNGIGEEENRFDNFKDNLKFIDQHNSKNTTYKLGLNKFADLTNQEYRSMFLGTKSDPKRRVTKSKNPSQRYASRAGDSFPESVDWRDHGAVTPVKDQGRCGSCWAFSTIAAVEGINKIATGELISLSEQELVDCDRSYDAGCDGGLMDYAFQFIIDNGGIDSEQDYPYLGADNNQCDPTRKNAKVVSIDGYEDVVQYDEKALKKAVSHQPVSVAIEASGRAFQLYESGVFSGECGSALDHGVIVIGYGTDENGHEYWTVRNSWGSGWGEDGYIRMERNVDDCAGKCGIAMEASYPVKNGANTIKPYWTNEDTEKISSA
>GhRD21-11
MDSQPSTMAILLLMMFTLSSAFDMSVVSYDKSHPDRSMSSWRTFDEVMAMYEDWLVKDGKVYNGLGEKEKRFEIFKDNLRFIDEHNSEETHSFKLGLNQFADLTNEEYRFTFLGVKKPNKKVSKRSDRYVHLLGEAALPDSVDWRTKGAVAPVKDQGSCGNCWAFSTIAAVEGINKIITGDLIVLSEQELVDCDTSYNEGCNGGLMDYAFEFIIKNGGIDTEEDYPYTNHNGRCDTYRKNAKVVSIEAYENVPENDEGALKKAVSNQPVSVAIEAGGRAFQLYQSGIFDGQCGTQLDHGETIVGYGTENGKDYWIVRNSWGDNWGEAGYVRMERNVVDTKTGKCGIAMEASYPIKTGRNPPNPGPSPPSPVKPPTVCDNYYSCPESNTCCCVYEHYGYC…
>GhRD21-12
MELTLLFPLFFFTLSSATYISTLTLNQNHPSSSSSWRSDDEVMGLYKSWVIQHGKAYNGIGEEEKRFEIFKDNLRFIDEHNSNNNTTYKLGLNKFADLTNQEYRAKFLGTRTDPRRRLMKSKIPSSRYAHRAGDNLPDSVDWRDHGAVSPVKDQGSCGDCWAFSTIATVEGINKIVSGELVSLSEQELVDCDRSYDAGCNGGLMDYAFQFIMDNGGIDTEKDYPYLGFNNQCDPTKKNAKVVSIDGYEDVPNNENALKKAVAHQPVSIAIEAGGRAFQLYESGVFNGECGLALDHGVVAVGYGTDDNGQDYWIVRNSWGSNWGENGYIRMERNINANTGKCGIAMEASYPVKNGANIIQPYHNESTENISSA
>GhCEP1
MRSICVVLLISLPFLLRIAQGFDFHDKDLASEDSLWDLYERWRSHHTVSRSLDEKHRRFNVFKQNVLHVHNTNNKDKPYKLKINKFADMTNHEFRNAYASSKIKHHKMFQGKSRGAGSFMYENVDRVPPSVDWRQKGAVTAVKDQGQCGNCWAFSTVVAVEGINQIKTNKLVSLSEQELIDCDTEENQGCNGGLMDIAFDFIKKKGGITTESNYPYQANDGSCDSAKVNSPAVAIDGHENVPANDEDALLRAVANQPVSVAIDAGSMDFQFYSEGVFTGECGTELNHGVAAVGYGTTLDGTKYWIVKNSWGAEWGEKGYIRMERGIRDKQGLCGIAMEASYPIKNSSSNPTGPSDSPKDEL
>GhCEP2
MDIRKLILVLFLLALVFGVAESFDYYESDLASEESLWDLYERWRSQHTVSRDLEEKQKRFNVFKENLKHIHKVNQMDKPYKLKLNKYADMTNHEFMSTRSSKVSHYRMLHGPRQMTDFRHDKTDNLPPSIDWRTKGAVTGIKDQGKCGSCWAFSTVVAVEGINKIKTGELVTLSEQELVDCDKENQGCEGGLMEQAFQFIKQSDGITTENYYPYRAKDESCDSSKLNGPVVIIDGYEMGVFIGDCGTEPNHGVAVVGYGATLDGTKYWIVKNSWGEDWGEKGYIRMKRDVDAEEGLCGLTLEASYPVKLQSNNNRKSSPRSKAKDEL
>GhCEP3
MDIRKLILVLFLLALVFGVAESFDYHESDLASEESLWDLYERWRSQHTVSRDLEEKQKRFNVFKENLKHIHQVNQMDKPYKLKLNKYADMTNHEFMSTRSSKVSHYRMLHGPRQMTDFRHDKTDNLPPSIDWRTKGAVTGIKDQGKCGSCWAFSTVVAVEGINKIKTGELVTLSEQELVDCDKENHGCEGGLMEQAFQFIKQSDGITTENYYPYRAKDESCDSSKLNGPVVIIDGYEMGVFIGDCGTLNHGVAVVGYGATLDGTKYWIVKNSWGEDWGEKGYIRMKRDVDAEEGLCGLTLEASYPVKLQSNNNRKSSPRSKAKDEL
>GhCEP4
MKTVNAVLSVVVAMALVLGIAESFDFHEKDLASEESLWDLYERWRSHLMVSRSLDEKHKRFNVFKQNVKHVLHTNNDNKPYKLMLNKFADMTNHEFRNAYASSKIRHHRMFQGTPRGTSSFTYENVNNVPTSVDWRKKGAVTAVKDQGQCGSCWAFSSVVAVEGINQIKTNKLVSLSEQELIDCDTEKNQGCNGGLMDIAFDFINKKGGITSEIHYPCAAKQGTCDVSKENSPVVSINGHENVPVNDEEALRKAVANQPVSVAIDAGGTDFQFYSEGVYTGQCGIELNHGVAAVGYGTTLDGTKYWIVKNSWGPDWGEKGYIRMERGIKDKQGLCGIAMEASYPIKNSSSNPTTPSFYPKDEL
>GhCEP5
MRSICVVLVISLPFLLGIAQGFDFHDNDLASEDSLWDLYERWRSHHTVSRSLDEKHRRFNVFKQNVLHVHNTNNKDKPYKLKINKFADMTNHEFRNAYASSKIKHHKMFQGQSRGAGSFMYENVDRVPPSVDWRQKGAVTAVKDQGQCGNCWAFSTVVAVEGINQIKTNKLVSLSEQELIDCDTEENQGCNGGLMDIAFDFIKKKGGITTESNYPYQANDGSCDAAKVNSPAVAIDGHENVPANDEDALLKAVANQPVSVAIDAGSMDFQFYSEGVFTGECGTELNHGVAAVGYGTTLDGTKYWIVKNSWGAEWGEKGYIRMERGIRDKQGLCGIAMEASYPIKNSSSNPTGPSYSPKDEL
>GhCEP6
MKTVNAVLSVVVAMALVLGIAESFDFHDKDLASEESLWDLYERWRSHLMVSRSLDEKHKRFNVFKQNVKHVLHTNNDNKPYKLKLNKFADMTNHEFRNAYASSKIRYHRMFQGTPRGTRSFMYENVNNVPTSVDWRKRGAVTAVKDQGQCGSCWAFSSVVAVEGINQIKTNKLVSLSEQELIDCDTEENQGCNGGLMDIAFDFINKKGGITSEIHYPYAAKQGTCDVSKENSPVVSIDGHENVPVNDEEALRKAVANQPVSVAIDAGGTDFQFYSEGVYTGQCGIEQNHGVAAVGYGTTLDGTKYWIVKNSWGPDWGEKGYIRMERGIKDKQGLCGIAMEASYPIKNSSSNPTTPSFYPKDEL
>GhXCP1
MAISLLSKFSTQTLLIASIFVVSALGHDFSIVGYSPEDLGSADKLIELFESWISKHGKIYESIEEKLMRFEVFKDNLKHIDKRNKEISSYWLGLNEFADLSHDEFKKMYLGLRPDVRRRSQSTKDFSYGDVVELPKSVDWRKKGAVTPVKNQGSCGSCWAFSTVAAVEGINKIVTGNLTSLSEQELIDCDTSFNNGCNGGLMDYALQFIIANGGLHKEQDYPYLMEEGTCEEKKEEMEVVTITGYHDVPENDEQSLLKALAHQPLSVAIEASGRDFQFYSGGVFNGPCGAELDHGVAAVGYGTTKGSDYIIVKNSWGAKWGEKGFIRMKRNTGKAEGLCGINKMASYPTKKN
>GhXCP2
MSYASIKSLSNDSIVKPQFSTPIFSSLQSNIPSATINVHATIPPSHSLTVTYYAIQRKEEMVVSFLSKLSILTFTASVLVVSALAHDFSIVGYSPEDLSSRDKLIELFESWVSKHAKFYESFEEKLLRFEVFKDNLKHIDKRNKEISSYWLGLNEFADLTHEEFKNKYLGLKPEVFKKNRSPPEEFTFRDDVDLPKSVDWRQKGAVTPVKNQRSCGSCWAFSAVAAVEGINKIVTGNLTSLSEQELIDCDTSFNNGCNGGLMDYAFEFIVANGGLHKEEDYPYLMEQGTCEEKKEEMDVVTISGYKDVPENDEKSLLKALAHQPLSVAIEASGRDFQFYSGGVFNGPCGTDLDHGVAAVGYGTWKGSDYIIVKNSWGPKWGEKGYIRMKRNTGKPEGLC…
>GhXCP3
MAISLLSKFSTQTLLIASIFVVSALGHDFSIVGYSPEDLGSADKLIELFESWISKHGKIYESIEEKLMRFEVFKDNLKHIDKRNKEISSYWLGLNEFADLSHDEFKKMYLGLRPDVRRKSQSTKDFSYGDVVELPKSVDWRNKGAVTPVKNQGSCGSCWAFSTVAAVEGINKIVTGNLTSLSEQELIDCDTSFNNGCNGGLMDYAFQFIIANGGLHKEQDYPYLMEEGTCEEKKEEMEVVTITGYHDVPENDEQSLLKALAHQPLSVAIEASGRDFQFYSGGVFNGPCGTELDHGVAAVGYGTTKGSDYIIVKNSWGAKWGEKGFIRMKRNTGKAEGLCGINKMASYPTKKN
>GhXCP4
MSYASIESLSNDSIVKPQFSTPIFSSLQSNIPSATINLHTTIPPSHSLTVTYYAIQQKEEMVVSFLSKLSILTFTASVLVVSALAHDFSIVGYSPEDLSSRDKLIELFESWVSKHAKFYESFEEKLLRFEVFKDNLKHIDKRNKEISSYWLGLNEFADLTHEEFKNKYLGLKPEVFKKNRSPPEEFTFRDDVDLPKSVDWRQKGAVTPVKNQRSCGSCWAFSAVAAVEGINKIVTGNLTSLSEQELIDCDTSFNNGCNGGLMDYAFEFIVANGGLHKEEDYPYLMEQGTCEEKKEEMDVVTISGYKDVPENDEKSLLKALAHQPLSVAIEASGRDFQFYSGGVFNGPCGTDLDHGVAAVGYGTWKGSDYIIVKNSWGPKWGEKGYIRMKRNTGKPEGLC…
>GhXBCP3-1
MGFQRNILGFLFLILASLTSLSSSLPSEYSIVEHEIDAFLSEERVLEIFQQWKEKHRKVYRHAEEAEKRFENFKGNLKYILERNAKRKANKWEHHVGLNKFADMSNEEFRKAYLSKVKKPINKGITLSRNMRRKVQSCDAPSSLDWRNYGVVTAVKDQGSCGSCWAFSSTGAMEGINALVTGDLISLSEQELVDCDTSNYGCEGGYMDYAFEWVINNGGIDSESDYPYTGVDGTCNTTKEETKVVSIDGYQDVEQSDSALLCAVAQQPVSVGIDGSAIDFQLYTGGIYDGSCSDDPDDIDHAVLIVGYGSEDSEEYWIVKNSWGTSWGIDGYFYLKRDTDLPYGVCAVNAMASYPTKQSSSPSPYPSPSVPPPPPPSTPPPPPPPSPSPSDCGDFSYCS…
>GhXBCP3-2
MEPLLASFLLSFLLFFDLSSAAASPSHISKKFETWCQQHGKSYLSEEEKSYRLKVFEDNYAFVTQHNAMVNSSYSLALNAFADFTHHEFKASRLGLSGAAIQFRRPNLREPRLVRDIPDSLDWREKGAVTQVKDQGSCGACWSFSATGAIEGVNKIVTGSLISLSEQELVDCDKTYNTGCEGGLMDYAFQFVINNHGIDTEEDYPYQGREHTCNKEKLKRHVVTIDDYTDVPMNNEKKLLQAVATQPVSVGICGSERAFQLYSKGIFTGPCSTSLDHAVLIVGYGSENGVDYWIVKNSWGRRWGMNGYIHMIRNSGKSEGICGINMLASYPIKTSPNPPPSPPPGPTKCDFFTYCSAGETCCCTHRIFGICFSWKCCGLDSAVCCKDNRHCCPHNYPIC…
>GhXBCP3-3
MGFQRNILGFLFLILASLTSLSSSLPSEYSIVEHEIDAFLSEERVLEIFQQWKEKNQKVYRHAEEAEKRFENFKGNLKYILERNAMRKANKWEHHVGLNKFADMSNEEFRKAYLSKVKKPINKGITLSRNMRRKVQSCDAPSSLDWRNYGVVTAVKDQGSCGSCWAFSSTGAMEGINALVTGDLISLSEQELVDCDTSNYGCEGGYMDYAFEWVINNGGIDSETDYPYTGVDGTCNTTKEETKVVSIDGYQDVEQSDSALLCAVAQQPVSVGIDGSAIDFQLYTGGIYDGSCSDDPDDIDHAVLIVGYGSEGSEEYWIVKNSWGTSWGIDGYFYLKRDTDLPYGVCAVNAMASYPTKQSSSPSPYPSPSVPPPPPPSTPPPPPPPSPSPSDCGDFSYCS…
>GhXBCP3-4
MEPLLASFLLSFLLFFDLSSAAASPSHISKIFETWCHQHGKSYSSEEEKSYRLKVFEDNYAFVTQHNAMTNSSYSLALNAFADLTHHEFKASRLGLSGAAIQFRRSTLREPRLVRDIPASLDWREKGAVTQVKDQGSCGACWSFSATGAIEGVNKIVTGSLISLSEQELVDCDKTYNTGCEGGLMDYAFQFVINNHGIDTEEDYPYQGREHTCNKEKLKRHVVTIDDYTDVPMNNEKKLLQAVATQPVSVGICGSERAFQLYSKGIFTGPCSTSLDHAVLIVGYGSENGVDYWIVKNSWGTRWGMNGYIHMIRNTGKSEGICGINMLASYPIKTSPNPPPSPPPGPTKCDFFTYCSAGETCCCTHRIFGICFLWKCCGLDSAVCCKDNRHCCPHNYPIC…
>GhTHI1
MENPSFTLLLVCVLCMSSVVQCKYNCPEKYDPHVMQERYQRWVARHGRKYKSKNEWTLRFGIYKSNSQFIDCVNSQNLSFKLTDNEFADMTNDEFRAMYLGYQSIRSPCESNSKGFAYDKYHNLPKSIDWRKKGAVAPIKNQGQCGSCWAFSAVAAIEGINQIKTGNLTSLSEQELIDCDTDSLDQGCNGGHMVQAYEFVINNGGITTEKDYPYTGRDDTCKRTQAKNHAVTISGYKRLPTNNETALQIAVSQQPVSVAIDAAGLEFQFYFGGVFNGDCGNELNHGVAIVGYGEVLNKKYWIVKNSWGTEWGEAGYVRLERGVSDKRGLCGIAMDTSYPVKK
>GhTHI2
MAESETNLAINVLPGIADTFEVQGRGELQLGILIENMRREGFELSVSPPKVMYKVEKGQKLEPIEEVTIEVNDEHVGLVMEALSHRRAEVADMGPVPGNVGRTRLSLTCPSRGLVGYRSVFSSDTRGTGFMHRAFQSYEKHRGPLGNVRKGVLVSMGYGTITAYALMSLEARGTLFVTPGMETYDGMIVGEHSRDTDLDVNPVRSKELSNMRAAGKDENVKLSPPKLMTLEEAIGYVASDELIELWDQSWQTAVVMENPSFTLLLVCALCMSSVVQCKYNCPEKYDPHDMQERYQRWVARHGRKYKSKNEWALRFGIYKSNSQFIDCVNSQNLSFKLTDNEFADMTNDEFRAMYLGYQSIRSPCESNSKGFAYDKYHNLPKSIDWRKKGAVAPIKNQGQ…
>GhSAG12-1
MSRTILESTIVDKHVQWMADFSRKYESKLEKEKRLNIFKDNLEYIESFNNGGNRSFKLGLNEFSDMTQDEFISTHTGYKMQNNPTLFESTSFMYENYSSAPKNFDWRDQNAVTHIKNQGGCRCCWAFSAAAAVEGLIKIKTGKLISLSEQQLLDCSRNGGNQGCNGGWMMNAFDYISQNQGIASEESYPYKQIQETCDTQINEVATISGYQMVPKNDEEALLKAVTNQPVSVALEGHGRDFQFYNGGVFTGDCGNSLTHAVTIVGYGTSEEGLNYWLIKNSWGQSWGENGYMKIQRNVETQGGLCGIAMKGSYPIA
>GhSAG12-2
MSRTIYEASVFDKHEQWMADYSRKYESKLEKEKRLNIFKENLEYIESFNNAHTGYKMQDNPMMPDSTSFMYENLSDVPTNFDWRDQGAVTPIKNQGQCGCCWAFSAVAAVEGIIQIKTGKLISLSEQQLLDCSTNGGNQGCSGGWMMNAFEHISQNQGITTEESYPYQQMQETCATQINKVATINGYQMVPKNDEEALLKAVTNQPVSVALNGYGQSFQFYKGGVFTGDCSNDLTHAVTIVGYGTSEEGLNYWLIKNSWGETWGENGYMRIQRDVNTPGGLCGIAMKASYPIA
>GhSAG12-3
MMSLIHVFLFLIFGTLASLAMSRTIHETFVVDKHEQWMVDYNRKYESKLEKEKRLNTFKENLEYIENFNNGGNRSFKLSLNEFADMNQDEFLAAHTGYRMQANPTMSESTSFMYENVSDAPTNLDWRAQGAVTPVKFQGQCGCCWAFSAVAAIEGIVQIKTGSLISLSEQQLLDCSIDGNRGCDGGLMVNAFEYIIRNQGITTEESYPYQETQETCDTEKQINKVATINEYQMVPENDEEALLKVVASQPVSVAIEGHGQDFRFYSGGVFTGDCGNALSHAVTVVGYGTSEEGLNYWLVKNSWGETWGEKGYIRIQRDVNTPGGLCGIAMKASYPVM
>GhSAG12-4
MATNVCQNMCLAYLLVLSIWISHARCRPLNEEHMLKRHEEWMAMHGRVYTDSAEHEKRFAIFKENVERIDAFNNGVEKGYKLGVNKFADLTNEEFHSLHTGYKRQSFELMSNSKPANFRHGNVTAAPTVVDWRKKGAVTSVKDQGSCGCCWAFSAVAAIEGKAALKKGKLISLSEQQLVDNGENEGCEGGFMDTAFQFIKSIHGLTSEANYPYQGSEGACRKKEANPAATITGYEDVPPNNEKALLQAVANQPVSVAIEGSGWSFQFYKSGVFSGECDTYLDHAVTLVGYGTNSDGTKYWLAKNSWGTDWGEKGYMRLERDVAAKEGLCGVAMKASYPLA
>GhSAG12-5
MASISQCLFLIFVLGIWASQASSRSVPEVSMSDRFEQWVSSYSRLYQDAAEKEKRFQIFKENMEYIEYHNADANKKYKLGVNEFTDLTNEEFKAMRNGYKMRSSNTVAASKTTSFRYENVSAVPSSMDWRKKGAVTGIKDQGQCGCCWAFSAVAAMEGISKLKTGTLISLSEQELVDCDVNGEDQGCNGGLMDDAFEFIISNKGLTTETNYPYEGVDGSCNKKKSANHAAKITGFEDVPSNSESALLKAVANQPVSVAIDAGGSDFQHYKSGVFTGECTTFLDHGVTTVGYGEAEDGTKYWLVKNSWGTSWGEDGYIRMQRDIDAAEGLCGIAMEASYPTA
>GhSAG12-6
MYERHQQWMVQFGRVYKDANERQKRFQIFKQNVARIDYFNAANNKPYKLGVNQFADLTNQEFTASRNGFKGHMCSNTATTFKYENATALPSTVDWRKKGAVTPIKDQGQCGCCWAFSAVAAMEGVTKLTTGKLISLSEQELVDCDTKGEDQGCEGGLMDDAFQFIEKNKGLTTESIYPYKGVDGTCNTNEEANHAAKINGFEDVPANSEDALQKAVANQPVSVAIDAGGFDFQFYSGGVFTGSCGTDLDQGVTAVGYVEYGGTKYWLVKNSWGSSWGEDGYIRMQRDVDAKEGLCGIAMQASYPTA
>GhSAG12-7
MASKNLLHHHFTCLALLIFILGVCEATSRAALEDASMYERHQQWMVQFGRVYKDTNERQKRFQIFKQNVARIDSFNAANNKPYKLGVNQFADLTNQELTTSRNGFKGHMCSNTATTFKYENATALPSTVDWRKKGAVTPIKDQGQCGCCWAFSAVAAMEGVTKLTTGKLISLSEQELVDCDTKGEDQGCEGGLMDDAFQFIEKNKGLTTESIYPYKGVDGTCSTNEEANHAAKINGFEDVPANSEDALQKAVANQPVSVAIDAGGFDFQFYSGGVFTGSCGTDLDHGVTAVGYGEDGGTKYWLVKNSWGSSWGEEGYIRMQRDVDAKEGLCGIAMQASYPTA
>GhSAG12-8
MASKNQLHHRFLYLALLFILGVCEATARAALEDASMYERRQQWMVQFGRDTNERQKRFQIFKQNVARIDSFNAANNKPYKLGVNLFADLTNQEFTASRNGFKGHMCSNTTTTFKYENATALPSTVDWRKKGAVTPIKDQGQCGCCWAFSAVAAMEGVTKLTIGKLISLSEQELVDCDTKGEDQGCEGGLMDDAFQFIEKNKGLTTESIYPYKGVDGTCNTNEEANHAAKINGFEDVPANSEDALQKSVANQPVSVAIDAGGFDFQFYSGGVFTGSCGTDLDHGVTAVEYGEDGGTKYWLVKNSWGREMWMQRKAFVALQCNHPTLLHKYNLNHSCLFYKFSYYI
>GhSAG12-9
MGSKNQLHHHFTCLALLIFILGVCEATSRAAVEDSSMYERHQQWMVQFGRVYKDNNDRQKRFLIFKQNVARIDAFNAANNKPYKLGVNQFADLTNQEFTASRNGFKGHMCSNTATTFKYENATGLPSTVDWRKKGAVTPIKDQGQCGCCWAFSAVAAMEGVTKLTTGKLISLSEQELVDCDTKGEDQGCEGGLMDDAFQFIEKNKGLTTESIYPYKGVDGTCNTNEEANHAAKINGFEDVPANSEDALQKAVANQPVSVAIDAGGFDFQFYSGGVFTGSCGTDLDHGVTAVGYGEDGGTKYWLVKNSWGSSWGEEGYIRMQRDVDAKEGLCGIAMQASYPTA
>GhSAG12-10
MAFALKTKFLIFMLTVSGALASAMSHILDEAFVAEKYKQWMVEHGRTYEMQEEETMRFQIFKNNLEFIENFNKMGNQTYKLRSCWAFSTVAAVEGVVKIKTGKLVSLSEQQLVDCARTGRTRGCDGGWMEDGFEYIGRNQGLAKESKYPYTGKDGKCSRRKETFRAAQITGYEDAPPDNEEYLLKAASQQPVAVALDSSGYGFQFYSGGVYGGPCRTELNHDVTVVGYGTSEDGIKYWLVKNSWGKSWGESGYMRIKRDVHSKKGLCGIAKTPSYPVA
>GhSAG12-11
MASTTPCLALLFVLGIWAFQVSSRSIPEVSMSDKFEQWMASYGRVYQDAFEKDKRFQIFKENVEYIESRNAGHTAKKYKLGVNEFTDLTNEEFKSMRNGYKMQRSTIVASSKTSSFRYENVTAVPPSMDWRSKGAVTNIKDQGQCGCCWAFSAVAAMEGITKLKTGNLVSLSEQELVDCDINGEDEGCSGGLMDDAFEFIITNKGLTTESNYPYQGVDGTCNKKAAANHAAQITGYEDVPSNSESALLKAVANQPVSVAIDAGGADFQNYKSGVFTGECGTSLDHGVTAVGYGEDDDGTKYWLVKNSWGTSWGEDGYIRMQRDIDAEEGLCGIAMEASYPTA
>GhSAG12-12
MASYGRVYQDPSEKDKRFQIFKENVEYIESHNADHTGKKYNLGVNEFKDLTNEEFKSMRNGYKMQRSTHVASSKTSSFRYENVPAVPSSMDWRSKGAVTNIKDQGQCGCCWAFSAVAAMEGITKLKTGNLVSLSEQELVDCDINGEDEGCSGGLMDDAFEFIITNKGLTTESIYPYQGVDGTCNKKAAANHAAQITGYEDVPSNSESALLKAVANQPVSVAIDAGGADFQHYKSGVFTGECGTSLDRGVTAVGNGEDDDGTKYWLVKNSWGTSWGEDGYIQMQRDIDAEEGLCGIAMEASYPTA
>GhSAG12-13
MASKNQLHHQFLYLALLFFILGVCEATSRTALEDASVYERHQQWMVQYGRVYKDTNERQKRFQIFKQNVARIDSFNAANNKPYKLGVNQFADLTNQEFTASRNGFKGHMCSNTATTFKYENATALPSTVDWRKKGAVTPIKDQGQCGCCWAFSAVAAMEGVTKLTTGKLISLSEQELVDCDTKGEDQGCEGGLMDDAFQFIEKNKGLTTESIYPYKGVDGTCNTNEEANHAAKINGFEDVPANSEDALQKAVANQPVSVAVDAGGFDFQFYSGGVFTGSCGTDLDHGVTAVGYGEDGGTKYWLVKNSWGSSWGEEGYIRMQRNVDAKEGLCGIAMQASYPTA
>GhSAG12-14
MASKNQLHHHFTCLALLIFILGICEATSRAALEDASMYERHQQWMVQFGRVYRDTNERQKRFQIFKQNVARIDSFNAANNKPYKLGVNQFADLTNQEFTASRNGFKGHMCSNTATTFKYENATALPSTVDWRKKGAVTPIKDQGQCGCCWAFSAVAAMEGVTKLTTGKLISLSEQELVDCDTKGEDQGCEGGLMDDAFQFIEKNKGLTTESIYPYKGVDGTCNTNEEANHAAKINGFEDVPANSEDALQKAVANQPVSVAIDAGGFDFQFSSGGVFTGSCGTDLDHGVTAVGYGEDGGTKYWLVKNSWVSSWGEEGYIRMQRDVDAKEGLCGIAMQASYPTA
>GhSAG12-15
MASKNQLHHHFTCLALLIFILGVCEATSRAALEDASMYERHQQWMVQFGRVYKDTNERQKRFQIFKQNVARIDSFNAANNKPYKLGVNQFADLTNQEFTASRNGFKGHMCSNTATNFKYENATALPSTVDWRKKGAVTPIKDQGQCGCCWAFSAVAAMEGVTKLTTGKLISLSEQELVDCDTKGEDQGCEGGLMDDAFQFIEKNKGLTTESIYPYKGVDGTCNTNEEANHAAKINGFEDVPANSEDALQKAVANQPVSVAIDAGGFDFQFYSGGVFTGSCGTDLDHGVTAVGYGEDGGTKYWLVKNSWGSSWGEEGYIRMQRDVDAKEGLCGIAMEASYPTA
>GhSAG12-16
MASKNQLHHHFTCLALLIFILGVCEATSRAALEDASMYERHQQWMVQFGRVYKDTNERQKRFQIFKQNVARIDSFNAANNKPYKLGVNQFADLTNQEFTASRNGFKGHMCSNTATTFKYENATALPSTVDWRKKGAVTPIKDQGQCGCCWAFSAVAAMEGVTKLTTGKLISLSEQELVDCDTKGEDQGCEGGLMDDAFQFIEKNKGLTTESIYPYKGVDGTCNTNEEANHAAKISGFEDVPANREDALQKAVANQPVSVAIDAGGFDFQFYSGGVFTGSCGTDLDHGVTAVGYGEDGGTRYWLVKNSWGSSWGEEGYIRMQRDVDAKEGLCGIAMQASYPTA
>GhSAG12-17
MASKNQLHHHFTCLALLIFILGVCEATSRAALEDASMYERHQQWMVQFGRVYKDTNERQKRFQIFKQNVARIDSFNAANNKPYKLGVNQFADLTNQEFTASRNGFKGHMCSNTATTFKYENATALPSTVDWRKKGAVTPIKDQGQCGCCWAFSAVAAMEGVTKLTTGKLISLSEQELVDCDTKGEDQGCEGGLMDDAFQFIEKNKGLTTESIYPYKGVDGTCNTNEEANHAAKINGFEDVPANREDALQKAVANQPVSVAIDAGGFDFQFYSGGVFTGSCGTDLDHGVTAVGYGEDGGTKYWLVKNSWGSSWGEEGYIRMQRDVEAKEGLCGIAMQASYPTA
>GhSAG12-18
MSRTILETFIVEKHEQWMVDYGREYESELEKEKRLNIFKENLEYIESFNNGGNKSFKLGLNEYADMTQDEFLASHTGYKMQYYPTLSKSTSYMYENFSDFPNSMMAAGLDINFDWRDHGAVTPVKQQGKCNCCWAFSAVAAIEGIIQIKTGKLISLSEQQLLDCSTNGGNKGCDGGLMTNAYDYITQNQGITTEKYYPYLEIQEACDSVKQSIKAATLNGYETLPVNDENAMFKAVANQPVSVGIDGSGQAFRFFQGGGVFNGDCGSDLNHAVTIVGYGTSEEGVDYWIVKNSWGGNWGENGFMKIQRGVNKCGIAMRASYPVA
>GhSAG12-19
MSLIHGVLSLIFWTFTLSLVMSQTINESAIVDKHEQWIVDYGRKYESKLEKEKRLNIFKDNLKYIESFNNDKNKSFKLSLNKFADLTHDEFIVAHTGYKMGDNSTMSQSTSFMYESFSDVPTSIDWRAKGAVTPIKSQGTCGNCWAFSAVAAVEGIIQIKTGKLISLSEQQLLDCSTNGGNQGCSGGWMMNAFDYIIQNQGITNEERYPYQSKQETCDTKKQINRVDVIINGYQMVPTNDEQALLKVVANQPVSVAIEGYGQDFRYYRGGVYTGDCGNAHNHAVTIVGYGTSEEGLDYWLVKNSWGETWGENGYMRIQRNVNTQGGLCGIATKASYISSIIS
>GhSAG12-20
MMSLIHVFLFLIFGTLASLAMSRTIHETFIVDKHEQWMVDYNRKYESKLEKEKRLNIFKENLEYIESFNNGGNRSFKLSLNEFADMTQDEFIAAHTGYKMQGNPTLSESTSFMYQNVSDVPTNLDWRAQGAVTPVKFQGQCGCCWAFSAVAAIEGIVQIKTGSLMSLSEQQLLDCSTDGGNRGCDGGQMVNAFEYVIRNQGITTEESYPYQETQETCDTEKQINKVATINEYQMVPENDEEALLMVVANQPVSVAIEGHGQDFRFYSGGVFTGDCGNALSHAVTVVGYGTSEEGLNYWLVKNSWGETWGENGYIRIQRDANTPGGLCGIAMKASYPVM
>GhSAG12-21
MSLIHAFLFLIFGTLASLAMSRTIYEASVVDKHEQWMVDYGRKYESKLEKEKRLNVFKENLEYIESFNNGGNRSFKLSLNEFADMTQDEFIAAHTGYKMQDNPIMPESTSFRYENVSDVPTNFDWRDQGAVTPIKNQGQCGCCWAFSAVAAVEGIIQIKTGKLISLSEQQLLDCSTNGGNQGCSGGWMMNAFEYISQNQGITTEESYPYQQMQETCDTQKNKVATINGYQMVPQNDEEALLKAVTNQPVSVALDGYGQSFQFYKGGVFTGDCSNELTHAVTIVGYGTSEEGLNYWLIKNSWGETWGENGYMRIQRDVNTPGGLCGIAMKASYPIA
>GhSAG12-22
MSLIHAFLFLIFGTLASLAMSRTIFEASVVDKHEQWMVDYGRKYESKLEKEKRLNIFKENLEYIESFNNGGNRSFKLSLNEFADMTQDEFIAAHTGYKMQDNPIMPESTSFRYENVSDVPTNFDWRDQGAVTPIKNQGQCGCCWAFSAVAAVEGIIQIKTGKLISLSEQQLLDCSTNGGNQGCSGGWMMNAFEYISQNQGITTEESYPYQQTQETYDTQINKVATINGYQMVPQNDEEALLKAVTNQPVSVALDGYGQSFQFYKGGVFTGDCSNDLTHAVTIVGYGTSEEGLNYWLIKNS
>GhSAG12-23
MSLIHAFLFLIFGTLASLAMSRTIYEASVVDKHEQWMVDYGRKYESKLEKEKRLNIFKENLEYIESFNNGGNRSFKLSLNEFADMTQDEFIAAHTGYKMQDNPIMPESTSFRYENVSDVPTNFDWRDQGAVTPIKNQGQCGCCWAFSAVAAIEGIVQIKTGSLISLSEQQLLDCSTDGGNRGCDGGQMVSAFEYVIRNQGITTEESYPYQETQETCDTEKQINKVATINEYQMVPENDEEALLKVVTSQPVSVAIEGHGQDFRFYSGGVFTGDCGNALSHAVTIVGYGTSEEGLNYLLVNNSWGETWGENGYIRIQRDANTPGGLCGIAMKASYPVM
>GhSAG12-24
MMSLIHVFLFLIFGTLASLAMSRTIHETFIVDKHEQWMVDYNRKYESKLEKEKRLNIFKENLEYIESFNNGGNRSFKLSLNEFADMTQDEFIAAHTGYKMQGNPTLSESTSFMYENVSDVPTNLDWRAQGVVTPVKFQGQCGCCWAFSAVAAIEGIVQIKTGSLMSLSEQQLLDCSTDGGNRGCDGGQMVNAFEYVIRNQGITTEESYPYQETQETCDTEKQINKVATINEYQMVPENDEEALLKVVASQPVSVAIEGHGQDFRFYSGGVFTGDCGNALSHAVTVVGYGTSEEGLNYWLVKNSWGETWGENGYIRIQRDANTPGGLCGIAMKASYPVM
>GhSAG12-25
MMSLIHVFLFLIFGTLASLAMSRTIHETFIVDKHEQWMVDYNRKYESKLEKEKRLNIFKENLEYIESFNNGGNRSFKLSLNEFADMTQDEFIAAHTGYKMQGNPTLSESTSFMYENVSDVPTNLDWRVQGAVTPVKFQGQCGCCWAFSAVAAVEGLIKIKTGKLIPLSEQQLLDCSRNGGNQGCEGGWMMNAFDYISQNQGITSEESYPYKEMQETCDTQINEVATISGYQMVPKNDEEALLKAVTNQPVSVALEGHGRDFRFYNGGVFKGDCGNSLTHAVTIVGYGTSEEGLNYWLIKNSWGQSWGENGYMKIQRNVERKGGLCGIAMKASYPIA
>GhSAG12-26
MASISQCLALIFVLGIWASQASSRSVPEVSMSDRFEQWVSSYSRLYQDAAEKEKRFQIFKENMEYIESHNTDTNKKYKLGVNEFTDLTNEEFKAMRNGYKMRSSNTVAALKTTSFRYENVSAVPSIMDWRKKGAVTGIKDQGQCGCCWAFSAVAAMEGISKLKTGTLISLSEQELVDCDVNGEDQGCNGGLMDDAFEFIILNKGLTTETNYPYEGVDGSCNKKKSANHAVKITGYEDVPSNSESALLKAVANQPVSVAIDAGGSDFQHYKSGVFTGECTTFLDHGVTAVGYGEAEDGTKYWLVKNSWGTSWGEDGYIRMQRDIDAAEGLCGIAMEASYPTA
>GhSAG12-27
MASTTPCLALLFVLGIWAFQVSSRSIPEVSMSDKFEQWMASYGRVYQDAFEKDKRFQIFKENVEYIESRNAGHTAKKYKLGVNEFTDLTNEEFKSMRNGYKMQRSTIVASSKTSSFRYENVTAVPSSMDWRSKGAVTNIKDQGQCGCCWAFSAVAAMEGITKLKTGNLVSLSEQELVDCDINGEDEGCSGGLMDDAFEFIISNKGLTTESNYPYQGVDGTCNKKAAANHAAQITGYEDVPSNSESALLKAVANQPVSVAIDAGGADFQNYKSGVFTGECGTSLDHGVTAVGYGEDDDGTKYWLVKNSWGTSWGEDGYIRMQRDIDAEEGLCGIAMEASYPTA
>GhSAG12-28
MASKNQVHHHFTCLALLIFILGVCEATSRTALEDASMYERHQQWMVQFGRVYKDNNERQKRFQIFKQNVARIDSFNAANNKPYKLGVNQFADLTNQEFTASRNGFKGHMCSNTATTFKYENATALPSTVDWRKKGAVTPIKDQGQCGCCWAFSAVAAMEGVTKLTTGKLISLSEQELVDCDTKGEDQGCEGGLMDDAFQFIEKNKGLTTESIYPYKGVDGTCNTNEEANHAAKINGFEDVPSNSEDALQKAVANQPVSVAIDAGGIDFQFYSGGVFTGSCGTALDHGVTAVGYGEDGGTKYWLVKNSWGSSWGEEGYIRMQRDVDAKEGLCGIAMQASYPTA
>GhSAG12-29
MASKNQLHHQFLYLALLFFILRVCEATSRTALEDASMYERHQQWMVKFGRVYKDTNERQKRFQIFKQNVARIDSFNAANNKPYKLGVNQFADLTNQEFTASRNGFKGHMCSNTATTFKYENATALPSTVDWRKKGAVTPIKDQGQCGCCWAFSAVAAMEGVTKLTTGKLISLSEQELVDCDTKGEDQGCEGGLMDDAFQFIEKNKGLTTESIYPYKGVDGTCNTNEEANHAAKINGFEDVPANSEDALQKAVANQPVSVAIDAGGFDFQFYSGGVFTGSCGTDLDHGVTAVGYGEDGGTKYWLVKNSWGSSWGEEGYIRMQRDVDAKEGLCGIAMQASYPTA
>GhSAG12-30
MTNSNFVLLFIVGILATQAMSRTVYESAIAEHEQWMVKHGRNYKNKAEKDKRFKIFKENLEYIQNFNNAGNRTYKLSINKYSDLTHDEFVAARTGYINPGNTMTSMETSFRYAEFTDVPTSLDWKSKGAVTSVKDQEQCGCCWAFAAVAAMEGLNQITNGNLVSLSEQQVLDCSGNSNGCNGGNKIEAFKYVIQNNGLTKEDNYPYQAMQGTCDLQKQASQVAHISNYESVPTNSEQELLKAVSNQPVAVSIEGSGTDFRHYSSGIFNGYCGTNPDHAVTIVGFGTSDDGTDYWLVKNQWGEDWGENGYIRMQRNVADSQGLCGLAIRPAYPTA
>GhRD19-1
MEYRNVFFIFVIFSFFIVGVICTETFSAEGFEVDPLIEQVTDGHEGAEPQLLTAEHHFSLFKKRFKKSYGSQEEHDYRFKIFQVNLRRAARHQKLDPSATHGVTQFSDLTPGEFRKAYLGLRRLRLPKDATEAPILPTDNLPQDFDWREKGAVTPVKNQGSCGSCWSFSTTGALEGANFLATGKLVSLSEQQLVDCDHECDPEEAGSCDSGCNGGLMNSAFEYTLKAGGLMREEDYPYTGTDRGTCKFDNTKVAAKVANFSVVSLDEDQIAANLFKNGPLAVAINAVFMQTYIGGVSCPYICSKRLDHGVLLVGYGSAGYAPVRMKDKPYWIIKNSWGENWGENGFYRICRGRNICGVDSMVSTVAAVNTNSE
>GhRD19-2
MAHRMAFPLFIVSHFLFVGLILAETFSAAASEVDPLIRQVTDVHDDGTEPQQLLTAAEHHFSLFKARFNKSYGSKAEHDYRFKVFRSNLRRAVRHQKLDPSATHGVTQFSDLTPGEFRKRFLGLNRRLRLPKEANQAPILPTNNLPEDFDWREKGAVTAVKNQGTCGSCWSFSTTGALEGANFLATGKLVSLSEQQLVDCDHECDPELAGSCDSGCNGGLMNTAFEYTLKASGIMREEDYPYTATDRGRCKFDKSKIVAKVANFSVVSLDEDQIAANLVKNGPLAVGINSVFMQTYIGGVSCPFFCSKHLDHGVLLVGYGSAGYSPIQLKDKPYWIIKNSWGENWGENGYYKICKGSNVCGVDSLVSTVVALNTKSQ
>GhRD19-3
MDRFSLLFLLLSSVVASAVVSDVNSDGDPLIRQVVSDGGVEEDSDDHLLNAEHHFTLFKSKYGKTYASQEEHDYRLGVFKANLRRAKRHQLLDPSAVHGVTKFSDLTPSEFRRQYLGLKPLKLPADAQKAPILPTDNLPDDFDWRDHGAVTGVKDQGSCGSCWSFSATGALEGAHYLATGELVSLSEQQLVDCDHECDPQQYGACDSGCNGGLMTSAFEYTLKVGGLEREKDYPYTGNDRGPCKFDKTKIAASVSNFSVISVDEDQIAANLVKHGPLAVGINAVFMQTYMGGVSCPYICFRTLDHGVLLVGYGAAGYSPIRFKDKPFWIIKNSWGANWGEDGYYKICRGRNVCGVDSMVSSVAALHTKSQ
>GhRD19-4
MAHRIAFSVCVVSYFLFIGLISSEAFSVVGSEVDPLIRQVTDGQDDGVETQPLTAEHHFSLFKARFKKSYGSEEEHDYRFKVFRANLRRAERHQKLDPSATHGVTQFSDLTPGEFRKRFLGLRRLRLPKDANQAPILPTDNLPEDFDWREKGAVTPVKNQGSCGSCWSFSTTGALEGANFLATGKLVSLSEQQLVDCDHECDPEEAGSCDSGCNGGLMNSAFEYTLKAGGLMREEDYPYTGTDRGTCKFDKSKIVAKVANFSVVSLDEDQIAANLVKNGPLAVAINAVFMQTYIGGVSCPYICSKRLDHGVLLVGYGSAGYAPIRLKDKPYWIIKNSWGETWGENGFYKICRGRNVCGVDSLVSTVAAVNTNSE
>GhRD19-5
MAHRMAFSLCVISYFLFIGLISSEAFSVVGSEVDPLIRQVTDGQDDGVETQPLTAEHHFSLFKARFKKSYGSEEEHDYRFKVFRANLRRAERHQKLDPSATHGVTQFSDLTPGEFRKRFLGLRRLRLPKDANQAPILPTDNLPEDFDWREKGAVTPVKNQGSCGSCWSFSTTGALEGANFLATGKLVSLSEQQLVDCDHECDPEEAGSCDSGCNGGLMNSAFEYTLKAGGLMREEDYPYTGTDRGTCKFDKSKIVAKVANFSVVSLDEDQIAANLVKNGPLAVAINAVFMQTYIGGVSCPYICSKRLDHGVLLVGYGSAGYAPIRLKDKPYWIIKNSWGETWGENGYYKICRGRNVCGVDSLVSTVAAVNTNSE
>GhRD19-6
MLDSGTRWRTGGIPEVYRRWTGGGGSMEDGVVASAVVAEVISNDGPLIRQVVSDGVAEEDFVDQLLNAEHHFTLFKSKFRKTYATKEEHDYRLGVFKANMRRAKRHQLLDPTAVHGVTKFSDLTPSEFRRQFLGLKPLKLPADAQKAPILPTDDLPDDFDWRDQGAVTGVKDQQGSCGSCWSFSTTGALEGAHYLATGELVSLSEQQLVDCDHECDPQEYGACDSGCNGGLMTTAFEYTIKAGGLEREKDYPYTGNARGPCKFDKTKIAASVSNFSVISIDEDQIAANLVKHGPLAVGINAVFMQTYIHGVSCPYICGKHLDHGVLLVGYGSAGYAPVRFKNKPYWIIKNSWGENWGENGYYKICRGNNVCGVDSMVSSVSALHILKRQQLSH
>GhRD19-7
MGIFPDEVILQILARLPVKPLFKTKTVCKLWYRLVSDKYFIKLYNEVSAKNPMVLIETSGSPESRSSLVCVDNLRGVSEVSLDFLKDRVKVRASCNGLLCCSSIPDKGVYYVCNPMTRDFKLLPRCRERPVTRFYPDGEATLVGLACDVSKNKFNVVLAGYHRTFGHRPDGTFICLIFDSDSNKWKKFVSHRDDHFTHMNKNQVVFVNGALHWLTGSCSYILALDLDYDVWRKISLPDEVSYGTGNRVYLLDSDGCLSLIQISDAWMNIWVMKDYEKEVWYMVDRVSLRCIRGLVPGIFPIAQTGECIFLATHKQVLVYHQKSRVWKEMYSVKNSASLPLWFSAYAFRSTIFPSD
>GhRD19-8
MAHRMAFPLFIVSHFLFVGFILAETFSAVASEVDPLIRQVTDVHDDGTEPQQLLTAAEHHFSLFKARFNKSYGSKAEHDYRFKVFRSNLRRAARHQKLDPSATHGVTQFSDLTPGEFRKRFLGLNRSLRLPKDANQAPILPTDNLPEDFDWREKGAVTAVKNQGTCGSCWSFSTTGALEGANFLATGKLVSLSEQQLVDCDHECDPELAGSCDSGCNGGLMNTAFEYTLKAGGLMREEDYPYTATDRGRCKFDKSKIIAKVANFSVVSLDEDQIAANLVKNGPLAVGINSVFMQTYIGGVSCPFICSKHLDHGVLLVGYGSAGYSPIHLKDKPYWIIKNSWGENWGENGYYKICRGSNVCGVDSLVSTVVALNTKSQ
>GhRD19-9
MEPGGQSLALTTTTIAIQILTFSLIFSFSFALLETPQEPTIHQVTENSDIPTMKTKFTRNHVHKQFRVFMVTYGKNYSTREEYMHRLRIFAKNLVRAAEHQLLDPTAVHGVTQFSDLSEEEFESLYTGFKGPTVAAPLLRDGVGGEAEVLEVDGLPESFDWREKGAVTEVKMQGTCGSCWAFSTTGAIEGANFIATGKLLNLSEQQLVDCDHMCDIKDKDACDNGCGGGLMTNAYKYLIEAGGLMEENAYPYTGERKECKFNPEKVAVEVVNFTNIAIDENQIAANLVLRGPLAVGLNAIFMQTYIGGVSCPIICGKRWINHGVLLVGYGAKGFSILRLGNQPYWIIKNSWGKRWGEHGYYRICRGHSMCGINTMVSAVATQVY
>GhRD19-10
MEYRNVFPIFVIFSFFIVGVICTETFSAEGFEVDPLIEQVTDGHEGAEPQLLTAEHHFSLFKKRFKKSYGSQKEHDYRFKIFQVNLRRAARHQNLDPSATHGVTQFSDLTPGEFRKAYLGLRRLRLPKDATEAPILPTDNLPQDFDWREKGAVTPVKNQGSCGSCWSFSTTGALEGANFLATGKLVSLSEQQLVDCDHECDPEEAGSCDSGCNGGLMNSAFEYTLKAGGLMREEDYPYTGTDRGTCKFDNTKVAAKVANFSVVSLDEDQIAANLFKNGPLAVAINAVFMQTYIGGVSCPYICSKRLDHGVLLVGYGSAGYAPVRMKDKPYWIIKNSWGENWGENGFYRICRGRNICGVDSMVSTVAAVNTNSE
>GhALP1
MARLTLVSSIILMLCCVTAASTFEDSNPIRMVSDGLRGYESSVLRVIGHTRHAISFARFAYKHGRKYETVEEMKLRFQIFKENLDLIRSTNKKGLSYTLAVNRFADWSWDEFQKHRLGAAQNCSATTKGNHQLTDVVLPESKDWREADIVSPVKEQGSCGSCWTFSTTGALEAAYHQAFGKGISLSEQQLVDCAGAFNNFGCHGGLPSQAFEYIKYNGGLDTEEAYPYTAKDGECKFSPENVGVQVIDSVNITLGAEDELKHAVALVRPVSVAFQVITSFRFYKTGVFTSDKCGTTSQDVNHAVLAVGYGVENGVPYWLIKNSWGAQWGDNGYFKMEMGKNMCGVATCASYPVVA
>GhALP2
MARLTFVTSIILLLCSVAAGSTFDDSNPIQMVSDGLTGFESSVLRVIGHTRHALSFARFAYKHGKRYENVEEMKLRFQIFEDNLDLIRSTNKKGLPYTLAVNQFTDWSWEEFQKHRLGAAQNCSATTKGNHQLTDVVLPDSKDWRRVGIVSPVKDQGSCGSCWTFSTTGALEAAYHQAFGKGISLSEQQLVDCAGAFNNFGCNGGLPSQAFEYIKYNGGLDTEESYPYTATNGLCKFSSESVGVKVLDSVNITLGAEDELKHAVAMVRPVSVAFEVVTSFRFYKSGVYTSKTCGSTPMDVNHAVLAVGYGVENGVPYWLIKNSWGAEWGDNGYFKMEMGKNMCGVATCASYPIVA
>GhALP3
MAGLTLMSSVIFLLCCLASASTFEDTNPIQMVSDGLDSSVLRVIGHTRRAISFARFAYKHGKRYEDVEEIKLRFQIFKDNMDLIRSTNKKGLPYSLSVNQFADLTWDEFRKHRLGAAQNCSATRKGNHQLTDVVLPESKDWRESGIVSPVKNQGSCGSCWAFSTTGALEAAYHQAFGKGISLSEQQLVDCAGAFNNFGCNGGLPSQAFEYIKYNGGLDTEEAYPYTAKDGQCTFSSENVGVQVIDAVNITLGSEDELKHAVAMVRPVSVAFEVVPSFNFYKSGVYTSDKCGNTSSDVNHAVLAVGYGIENGVPYWLIKNSWGAEWGDKGYFKMEMGKNMCGKSQPH
>GhALP4
MAGLTLMSSVIFLLCCLASASTFEDTNPIQMVSDGLDSSVLRVIGHTRRAISFARFAYKHGKRYEDVEEIKLRFQIFKDNMDLIRSTNKKGLPYSLSVNQFADLTWDEFRKHRLGAAQNCSATRKGNHQLTDVVLPESKDWRESGIVSPVKNQGSCGSCWAFSTTGALEAAYHQAFGKGISLSEQQLVDCAGAFNNFGCNGGLPSQAFEYINYNGGLDTEEAYPYTEKDGQCIFSSENVGVQVIDSVNITLGSEDELKHAVAMVRPVSVAFEVVPSFNFYKSGVYSSDKCGNTSSDVNHAVLAVGYGIENGVPYWLIKNSWGAEWGDKGYFKMEMGKNMCGVATCASYPVVA
>GhALP5
MARLTLVSSIILLLCSVAAGSTFEDSNPIQMVSDGLSGFESSVLRVIGHTRHALSFARFAYKHGKRYENVEEMKLRFQIFKGNLDLIRSTNKKGLPYTLAVNQFADWSWEEFQKHRLGAAQNCSATTKGNHQLTDVVLPDSKDWRRVGIVSPVKDQGSCGSCWTFSTTGALEAAYHQAFGKGISLSEQQLVDCAGAFNNFGCNGGLPSQAFEYIKYNGGLDTEESYPYTATNGLCKFSSENVGVKVLDSVNITLGAEDELKHAVAMVRPVSVAFEVVTSFRFYKSGVYTSKTCGSTPMDVNHAVLAVGYGVENGVPYWLIKNSWGAEWGDNGYFKMEMGKNMCGVATCASYPIVA
>GhALP6
MARLTLVSSIILMLCCFAAASTFEDSNPIRMVSDGLRGYESSVLRVIGHTRHAISFARFAYKHGRKYETVEEMKLRFQIFKENLDLIRSTNKKGLSYTLAVNQFADWSWDEFQKHRLGAAQNCSATTKGNHQLTDVVLPESKDWREAGIVSPVKEQGSCGSCWTFSTTGALEAAYHQAFGKGISLSEQQLVDCAGAFNNFGCHGGLPSQAFEYIKYNGGLDTEEAYPYTAKDGECKFSAENVGVQVIDSVNITLGAEDELKHAVALVQPVSVAFQVITGFRFYKTGVFTSDKCGTTSQDVNHAVLAVGYGVENGVPYWLIKNSWGAQWGDNGYFKMEMGKNMCGVATCASYPVVA
>GhCTB1
MASPSFFFATFLLLLSTVHPKLIAVEQLSDVKLNSRILQDSIVKQVNQNPKAGWEAALNPRFSNYTIGEFKHLLGVKPTPKKELLGVPILSHDKSLKLPTSFDARTAWPQCTSIGRILAELMLWGHCGSCWAFGAVESLSDRFCIHFDMNISLSVNDLLACCGFLCGDGCDGGYPISAWRYFVRSGVVTEECDPYFDDIGCSHPGCEPAFPTPKCVRKCVKGNLLWKQSKHYSVGAYRIKSNPADIMAEVYKNGPVEVSFTVYEDFAHYKSGVYRHLTGDVMGGHAVKLIGWGTSYDGEDYWLLANQWNRGWGDDGYFKIKRGVDECGIESDVVAGLPSTKNLVREVTDTGIVEDASF
>GhCTB2
MKKMATPLLFFATFLVLLTTVHPKVIAVGQPSEVKLNSRILQDSIVKLVNENPKAGWKAALNPRFSNYTVGEFKHILGVKPTPKKELLGIPIIRHGKSLKMPANFDARTAWPQCSTIGRILDQGHCGSCWAFGAVESLSDRFCIHFGMNISLSVNDLLACCGFLCGSGCDGGVPISAWQYFVRSGVVTEECDPYFDDIGCSHPGCEPACPTPMCEKKCVKGNQLWSQSKHYSVGAYRINSDPTDIMAEVYKNGPVEVAFTVYEDFAHYRSGVYKHVTGSVMGGHAVKLIGWGTSDDGEDYWLLANQWNKGWGEDGYFKIRRGTNECGIEDDVVAGLPSTKNLVRDVADMDILKAASF
>GhCTB3
MASPSFFFATFLLLLSTVHPKVIAVEQLSDVKLNSRILQDSIVKQVNKNPKAGWEAALNPRFSNYTIGEFKHLLGVKPTPKKELLGVPILTHDKSLKLPTSFDARTAWPQCTSIGRILDQGHCGSCWAFGAVESLSDRFCIHFDMNISLSVNDLLACCGFLCGDGCDGGYPISAWRYFVRSGVVTEECDPYFDDIGCSHPGCEPAFPTPKCVRKCVKGNLLWKQSKHYSVGAYRIKSNPADIMAEVYKNGPVEVSFTVYEDFAHYKSGVYKHLTGDVMGGHAVKLIGWGTSDDGEDYWLLANQWNRGWGDDGYFKIKRGVDECGIESDVVAGLPSTKNLVREVTDTGIVEDASF
>GhCTB4
MATPLFFFATFLLLLATVHPKVIAVGQPSEVKLNSRILQDSIVKRVNENPKAGWKAALNPRFSNYTVGEFKHILGVKPTPKKELLGIPIIRHGKSLKMPANFDARTAWPQCSTIGRILDQGHCGSCWAFGAVESLSDRFCIHFGMNISLSVNDLLACCGFLCGSGCDGGVPISAWRYFVRSGVVSEECDPYFDDIGCSHPGCEPAYPTPMCEKKCVKGNQLWSQSKHYSVGAYRINSDPTDIMAEVYKNGPVEVAFTVYEDFAHYKSGVYKHVTGSVMGGHAVKLIGWGTSDDGEDYWLLANQWNKGWGEDGYFKIRRGTNECGIEDDVVAGLPSTKNLVREVADMDILKAASF

## Sheet: Supplementary table 5
	Supplementary Table 5 Chromosomes location of PLCP genes family
Number	Nomenclature	Chr.	Start	End
1	GhRD21-1	GhA01	27231996	27234600
2	GhRD21-2	GhA03	97671503	97673317
3	GhRD21-3	GhA05	18738748	18741312
4	GhRD21-4	GhA06	2030861	2033637
5	GhRD21-5	GhA11	34755852	34757240
6	GhRD21-6	GhA12	24709481	24711752
7	GhRD21-7	GhD01	19250453	19253070
8	GhRD21-8	GhD02	64857836	64860545
9	GhRD21-9	GhD05	18151788	18154200
10	GhRD21-10	GhD11	25352578	25353965
11	GhRD21-11	GhD06	1754777	1757398
12	GhRD21-12	GhD12	14414945	14417149
13	GhCEP1	GhA03	14362665	14363831
14	GhCEP2	GhD12	44756650	44758201
15	GhCEP3	GhA12	70615582	70622015
16	GhCEP4	GhA12	78635077	78637577
17	GhCEP5	GhD03	33134979	33136145
18	GhCEP6	GhD12	51157767	51160136
19	GhXCP1	GhA04	55346	57137
20	GhXCP2	GhA12	1498053	1499483
21	GhXCP3	GhD04	46693459	46695256
22	GhXCP4	GhD12	1563073	1564502
23	GhXBCP3-1	GhD06	46587774	46589592
24	GhXBCP3-2	GhA05	16822655	16824922
25	GhXBCP3-3	GhA06	79231191	79233010
26	GhXBCP3-4	GhD05	16400474	16402739
27	GhTHI1	GhA05	84422544	84423655
28	GhTHI2	GhD04	5914851	5926512
29	GhSAG12-1	GhA04	9869849	9871010
30	GhSAG12-2	GhA04	9968681	9970848
31	GhSAG12-3	GhA04	10013557	10015926
32	GhSAG12-4	GhA05	13432489	13433615
33	GhSAG12-5	GhA05	13434687	13435790
34	GhSAG12-6	GhA05	85294695	85295731
35	GhSAG12-7	GhA05	85332996	85334140
36	GhSAG12-8	GhA05	85558886	85563537
37	GhSAG12-9	GhA05	7866	9008
38	GhSAG12-10	GhA06	83229434	83230548
39	GhSAG12-11	GhA10	2666030	2667148
40	GhSAG12-12	GhA10	2672571	2673574
41	GhSAG12-13	GhD04	5243670	5244814
42	GhSAG12-14	GhD04	5276907	5278051
43	GhSAG12-15	GhD04	5302079	5303223
44	GhSAG12-16	GhD04	5310403	5311547
45	GhSAG12-17	GhD04	5332376	5333520
46	GhSAG12-18	GhD05	51609386	51611100
47	GhSAG12-19	GhD05	51724963	51726259
48	GhSAG12-20	GhD05	51806316	51808627
49	GhSAG12-21	GhD05	51890157	51892445
50	GhSAG12-22	GhD05	52005546	52007725
51	GhSAG12-23	GhD05	52035467	52126519
52	GhSAG12-24	GhD05	52149350	52151707
53	GhSAG12-25	GhD05	52164168	52218379
54	GhSAG12-26	GhD05	13164154	13165257
55	GhSAG12-27	GhD10	2529556	2530674
56	GhSAG12-28	GhA05	85200173	85201315
57	GhRD19-1	GhA13	3532356	3534210
58	GhRD19-2	GhA07	2026854	2027987
59	GhRD19-3	GhD02	22257200	22259021
60	GhRD19-4	GhD02	65834252	65836940
61	GhRD19-5	GhA03	98657717	98660412
62	GhRD19-6	GhD05	16346376	16348746
63	GhRD19-7	GhA10	93392818	93394495
64	GhRD19-8	GhD07	2265230	2266363
65	GhRD19-9	GhD10	57072428	57074110
66	GhRD19-10	GhD13	3018651	3020501
67	GhALP1	GhD13	43615	45411
68	GhALP2	GhA06	18890531	18893088
69	GhALP3	GhD05	2901056	2903962
70	GhALP4	GhA05	2938682	2941674
71	GhALP5	GhD06	13947285	13949905
72	GhALP6	GhA13	75828346	75830110
73	GhCTB1	GhA11	4128545	4131475
74	GhCTB2	GhA11	10056896	10059714
75	GhCTB3	GhD11	4414428	4417382
76	GhCTB4	GhD11	9820203	9823003

## Sheet: Supplementary table 6
Supplementary table 6 The homologous gene pairs were identified in cotton
Homologous Gene 1	Homologous Gene 2	dN	dS	dN/dS	Positive selection
GhRD21-1	GhRD21-7	0.0019	0.0194	0.0979381	negative
GhCEP1	GhCEP5	0.0155	0.0821	0.188794	negative
GhRD21-2	GhRD21-8	0.0039	0.0125	0.312	negative
GhRD19-5	GhRD19-4	0.0079	0.0307	0.257329	negative
GhSAG12-3	GhSAG12-24	0.0097	0.0189	0.513228	negative
GhXCP1	GhXCP3	0.0039	0.0374	0.104278	negative
GhALP4	GhALP3	0.0095	0.0272	0.349265	negative
GhSAG12-5	GhSAG12-26	0.0019	0.051	0.0372549	negative
GhXBCP3-2	GhXBCP3-4	0.0097	0.0188	0.515957	negative
GhRD21-3	GhRD21-9	0.0205	0.0565	0.362832	negative
GhTHI1	GhTHI2	0.0058	0.0321	0.180685	negative
GhSAG12-7	GhSAG12-15	0.0019	0.0191	0.0994764	negative
GhRD21-4	GhRD21-11	0	0	N.A.
GhALP2	GhALP5	0	0	N.A.
GhXBCP3-3	GhXBCP3-1	0.0059	0	N.A.
GhRD19-2	GhRD19-8	0.0079	0.0183	0.431694	negative
GhSAG12-11	GhSAG12-27	0.0098	0.0567	0.17284	negative
GhRD19-7	GhRD19-9	0.0164	0.0234	0.700855	negative
GhCTB1	GhCTB3	0.0038	0.0326	0.116564	negative
GhCTB2	GhCTB4	0	0	N.A.
GhRD21-5	GhRD21-10	0.022	0.0838	0.26253	negative
GhXCP2	GhXCP4	0.0249	0.1294	0.192427	negative
GhRD21-6	GhRD21-12	0.0096	0.069	0.13913	negative
GhCEP3	GhCEP2	0.0019	0.0129	0.147287	negative
GhCEP4	GhCEP6	0.0097	0.0391	0.248082	negative
GhRD19-1	GhRD19-10	0.0077	0.0327	0.235474	negative
GhALP6	GhALP1	0.0076	0.0277	0.274368	negative
GhSAG12-28	GhSAG12-13	0.0039	0.0257	0.151751	negative
GhSAG12-7	GhSAG12-14	0.0285	0.0424	0.67217	negative
GhSAG12-7	GhSAG12-16	0.0098	0.0449	0.218263	negative
GhSAG12-7	GhSAG12-17	0.0059	0.0569	0.103691	negative
GhSAG12-3	GhSAG12-20	0.0076	0.0137	0.554745	negative
GhSAG12-3	GhSAG12-23	0.0112	0.0372	0.301075	negative

## Sheet: Supplementary table7
Supplementary Table 7 PLCP genes tissue expression data
Number	Nomenclature	GhRoot	GhStem	GhLeaf	GhPetal	GhAnther	GhStigma	GhOvule	GhFiber10DPA	GhFiber20DPA	GhSeed10DPA	GhSeed20DPA	24h-Cyto	48h-Cyto	72h-Cyto	96h-Cyto	120h-Cyto
1	GhRD21-1	23.2788	96.4301	56.7377	153.756	173.525	34.4731	24.6861	28.2882	12.1353	29.4705	3.4014	6.56858	12.2251	14.6913	9.11165	20.5787
2	GhCEP1	0.403135	9.1246	2.63146	391.397	44.5967	14.9752	12.6626	6.52635	34.7504	310.455	342.243	3.22373	0.523991	0.539945	0.330941	0.151786
3	GhRD21-2	2.12728	4.73282	3.69065	1.22177	110.8	7.40514	8.05843	13.2763	6.61569	5.8873	2.08159	5.96996	1.59678	0.727364	0.919475	1.69191
4	GhRD19-5	13.8638	21.2533	20.5983	84.5772	59.5278	15.4972	13.6049	57.7177	38.5668	27.3314	19.059	9.83549	7.21096	7.72957	14.8207	11.3777
5	GhSAG12-2	0.0936397	0	0	0	0	0	0	0.0657256	0	0	0	0.327386	0	0	0.39938	0.0922332
6	GhXCP1	2.60361	2.21741	5.20537	4.37235	0.632784	4.36517	0.294454	0.105833	0.492388	2.10507	0.343601	8.63073	8.54868	3.41138	0.511897	0.459139
7	GhALP4	27.6587	4.75159	39.7994	27.9627	72.0108	11.6743	5.34224	11.4299	17.0695	10.0576	23.7657	3.73878	5.84903	2.98774	3.05798	2.70962
8	GhSAG12-4	0	0.329934	0	0.212016	0	0.105803	0.262838	0	0.0854407	0	0	0	0.0960877	0	0.0912736	0
9	GhXBCP3-2	3.77379	4.85048	3.08433	27.2516	6.30572	4.32735	5.06757	4.61618	1.43273	2.77186	0.454138	5.64694	4.26275	4.55855	3.69575	3.33027
10	GhRD21-3	41.997	185.09	67.9507	171.196	138.993	41.8239	15.1691	9.20369	37.4411	17.6244	3.73496	28.9454	26.8485	29.4193	34.7635	45.235
11	GhTHI1	0.858373	0	0	0.105262	7.07072	0.735447	0.130519	0.054724	0.0848589	0.363058	0.53301	0	0	0.11211	0	0
12	GhSAG12-8	0	0	0	0	0	0	0	0	0	0	0.0588214	0	0	0	0	0
13	GhRD21-4	0.306268	0	0	0.297484	0.092955	0.148771	0.216862	0	0.302684	0.085784	0	2.73837	3.76168	17.3466	46.0092	50.4384
14	GhALP2	25.707	192.16	127.009	32.0085	205.615	30.5512	24.0742	5.23971	15.4398	65.4157	28.239	189.395	82.3576	45.3698	21.7338	38.6176
15	GhXBCP3-3	19.7999	19.7359	42.7864	139.477	24.1981	68.9636	102.379	991.942	8.44283	209.411	6.69832	13.9938	24.7156	14.6351	8.32362	13.8718
16	GhSAG12-10	0	0	1.73269	0	0	0	0	0	0	0	0	0.720467	0.300453	1.48552	1.25173	2.25407
17	GhRD19-2	0	1.94978	0.800258	0.843443	1.86855	0	0	0	0	0	2.3275	0.0682328	0.0452152	0	0	0
18	GhSAG12-11	0.0390169	0	0	0	0	0	0	0	0	0	0	0	0	0	0	0
19	GhSAG12-12	0	0	0	0	0	0.121155	0.0500189	0	0	0	0	0	0	0	0	0
20	GhRD19-7	0	0	0	0	0	0	0	0.0478576	0.296968	0	57.4883	0.171729	0.07529	0.192134	0.0745424	0
21	GhCTB1	12.6551	17.8065	31.571	94.8663	33.9939	9.35296	22.5198	8.97661	9.49603	5.2732	4.37998	52.7103	96.8263	99.9859	96.6731	68.0655
22	GhCTB2	9.61486	11.3212	19.8372	9.89829	23.0276	7.9864	18.9104	73.9203	61.1975	42.5552	38.5339	185.802	120.338	65.3895	57.434	53.3224
23	GhRD21-5	4.31512	1.00576	5.05856	0.386992	0.602533	5.0243	1.3625	1.1092	1.64225	2.22662	3.76483	252.99	113.33	20.2882	17.7702	14.7913
24	GhXCP2	1.51267	2.81705	5.14324	66.2953	19.8136	9.11645	0.14036	0.13249	0.137053	0.973088	0.238964	14.4015	6.12874	1.57291	0.146816	0.326419
25	GhRD21-6	39.4295	22.0705	43.8865	121.467	58.9902	47.2878	46.2004	316.276	191.862	96.5011	32.5722	32.1962	45.4179	28.0475	20.097	23.1886
26	GhCEP3	0	0	0	0.669264	0.13862	0	0	0	12.834	0	20.1101	0.34391	0.090827	0	0.0844368	0.245842
27	GhCEP4	1.01965	0.407464	0.209151	1.1762	0.610313	11.6477	0.0811717	0.306366	179.063	1.35331	11.549	0	0	0.104356	0	0
28	GhRD19-1	17.5419	14.3116	32.9191	35.9692	29.6796	18.5794	34.7666	93.4747	50.7365	49.7007	12.0491	5.4515	8.94165	7.18849	9.35414	12.2326
29	GhALP6	8.89283	61.788	13.6349	4.83148	23.5561	16.0796	17.7433	82.0538	5.28203	51.7537	11.5678	2.41701	3.23792	2.62143	1.10484	2.43408
30	GhRD21-7	37.2461	177.989	108.747	313.507	357.539	47.6629	33.9239	26.2845	35.674	26.7914	5.86741	18.6002	28.3419	29.0867	23.7663	43.5221
31	GhRD19-3	139.077	729.687	245.817	26.4457	28.0508	85.7457	92.8527	45.751	39.4337	148.315	31.0261	178.883	180.517	204.891	235.645	342.022
32	GhRD21-8	2.03522	2.40455	1.11107	0.65472	55.133	8.85222	5.09398	7.25109	5.31798	1.95502	2.24189	3.38791	1.17635	0.900384	1.25646	2.51865
33	GhRD19-4	13.5471	22.8277	15.8527	46.5458	55.7557	14.1743	16.7415	87.2671	38.7964	30.2715	16.2829	9.30192	6.63176	10.0476	12.1455	11.9334
34	GhCEP5	0.25654	7.68927	4.94714	1200.63	1337.16	78.4229	1.42964	19.4763	0.239108	181.165	511.307	0.521912	0.389334	0	0.244938	0.15085
35	GhSAG12-13	0.156068	0	0.112221	0	0.261879	0	0.0435062	0.328344	0	0.242039	0.0592234	0	0	0	0	0
36	GhSAG12-14	0.0390169	0	0	0	0	0	0	0	0	0	0	0	0	0	0	0
37	GhSAG12-15	0.117051	0	0	0.526309	1.30939	0	0	0	0	0	0	0	0.0479917	0	0	0
38	GhSAG12-16	0	0	0	0	0	0.210128	0.0435062	0	0	0	0	0	0	0	0	0
39	GhSAG12-17	0.0390169	0	0	0.210524	0.392818	0.315191	0.0435062	0	0	0	0	0	0.047731	0	0	0
40	GhTHI2	2.31932	2.79337	1.84289	0.277354	0.764889	3.88865	3.64537	1.46235	1.13555	1.98747	2.72182	2.11039	0.964414	0.182638	0.509703	0.879844
41	GhXCP3	3.62242	4.43482	13.881	7.62619	0.75934	3.04547	0.420649	0.0529163	0.984777	1.75423	0.286334	16.549	13.3703	2.31842	1.20634	0.610305
42	GhALP3	20.2859	3.01671	15.8271	13.3902	30.4795	13.1591	13.1329	31.528	90.8348	17.5455	20.0982	10.0493	17.1594	9.99955	9.32959	7.26128
43	GhSAG12-26	0	0	0	0.105634	0.262789	0	0	0	0	0	0	0.653583	0	0	0	0
44	GhRD19-6	12.9673	8.73503	16.3917	0.535447	0.556425	2.05089	4.44414	0.978695	2.89214	1.74716	0.806961	0.961136	4.06917	9.13935	11.0332	14.9303
45	GhXBCP3-4	3.44433	3.93056	3.34135	6.09153	3.40309	4.72803	4.03405	3.44115	1.17224	5.45132	0.772034	4.7411	3.34896	2.09759	1.9793	2.20206
46	GhRD21-9	40.1354	61.8829	42.3322	160.834	133.959	47.006	14.9451	11.3735	38.6256	36.0858	24.3268	13.0056	13.1876	10.7612	14.8122	13.7158
47	GhSAG12-21	0.079937	0.223831	0.460094	0	2.41546	0	0	0	0	0	0	0	0	0	0.168903	0
48	GhSAG12-22	0	0	0	0	0.612901	0	0	0	0.099019	0	0	0.0783175	0	0	0	0.0883498
49	GhSAG12-23	0	0.111132	0	0	0.133247	0.106933	0	0	0	0	0	0	0	0	0	0
50	GhSAG12-24	0	0.110745	0	0	0	0.106553	0	0	0	0	0	0	0	0	0	0
51	GhSAG12-25	0	0	0.114615	0	0	0	0	0	0	0	0	0	0	0	0.087166	0.158764
52	GhRD21-11	0	0	0	0	0	0	0	0	0.129571	0.0919068	0	0	0.179711	2.42314	11.6297	18.8708
53	GhALP5	45.3235	291.794	135.168	6.14	5.51314	13.8687	20.4506	4.61094	34.7801	43.7649	22.3984	694.041	433.62	193.287	85.1432	141.854
54	GhXBCP3-1	18.4969	17.9546	36.2263	99.5	16.7001	53.5627	75.0726	572.109	8.27619	154.071	7.74372	13.9414	27.5709	15.1535	4.83781	13.6273
55	GhRD19-8	0.0348664	1.7548	3.50113	20.3364	18.6855	1.12335	0	0.391038	1.44064	0.107877	0.211591	0	0	0	0	0
56	GhSAG12-27	0.195085	0.109222	0	0	0.261879	0	0.217531	0	0	0.121019	0	0.218834	0.048304	0.23179	0	0.0818624
57	GhRD19-9	0	0	0	0	0	0	0	0.0957152	0	0.422333	73.8544	1.14765	0.0755712	0	0	0.066906
58	GhCTB3	38.3491	93.1455	107.29	245.016	81.4634	34.7879	43.0834	35.5892	42.3129	22.4202	11.0368	156.333	176.211	135.885	120.89	122.793
59	GhCTB4	11.2086	24.3353	24.9912	12.3215	24.8916	6.15091	7.43826	32.9082	48.9167	31.4812	37.4342	199.726	112.125	68.0071	65.1803	68.779
60	GhRD21-10	2.84079	2.5144	11.2527	0.386992	0.120507	1.44932	2.28419	0.151254	0.312809	5.45522	4.52871	521.779	262.975	44.4882	25.7005	19.3949
61	GhXCP4	0.63028	1.32049	3.24836	50.3337	28.2449	8.35675	0.175449	0.353307	4.79684	1.0704	1.57716	8.11659	3.89821	0.821385	0.653355	0.322244
62	GhRD21-12	26.872	14.7523	38.2049	32.085	18.86	37.5617	45.2897	175.318	89.6983	74.8408	15.578	81.1726	90.6127	89.0108	105.531	104.27
63	GhCEP2	3.49473	0.345484	2.84168	0.222259	0.138114	0.665261	0	0	17.0804	0.127686	175.907	0	0.134075	0	0	0
64	GhCEP6	0.327743	1.01866	0.522877	0.490082	3.53982	1.07668	0.121758	0.612732	144.533	0.112776	10.7202	0.0635428	0.08437	0.103487	0.0781136	0.0745314
65	GhRD19-10	21.6008	27.6362	58.1402	76.2092	36.1831	21.3284	36.2611	92.2376	44.9797	55.8177	15.2086	6.77537	12.4787	13.445	14.8383	15.174
66	GhALP1	29.7424	153.372	81.2729	23.4528	40.0955	36.8826	90.8407	39.2978	40.0622	249.043	83.8096	11.019	9.88846	11.888	11.4876	14.9413
67	GhSAG12-29	0	0	0	0.315785	0.261879	0	0	0	0	0	0	0.0715634	0	0	0	0
68	GhSAG12-30	1.24336	0.898489	7.5033	0.649871	0.538681	0.972774	0.0894648	0.0562615	0.0872351	0.746915	0.121775	0.903702	0.149848	1.17654	1.29052	1.5728

## Sheet: Supplementary table 8
SupplementaryTable 8 PLCP genes abiotic expression data
Number	Nomenclature	1hCK	3hCK	6hCK	12hCK	1hhot	3hhot	6hhot	12hhot	1hsalt	3hsalt	6hsalt	12hsalt	1hcold	3hcold	6hcold	12hcold	1hPEG	3hPEG	6hPEG	12hPEG
1	GhRD21-1	67.4214	121.241	181.723	272.019	21.3262	78.7875	178.361	214.057	81.8154	159.546	319.564	211.373	72.5965	60.8084	43.1096	45.0062	77.9941	173.308	272.073	309.242
2	GhCEP1	1.09759	0.58868	0.967368	1.11961	0.668285	0.18652	0.377842	0.210271	0.0985283	1.17229	0.089229	0.337365	0.37984	0.655528	0.705533	0.270224	0.60364	0.0840925	0.371472	0.0608606
3	GhRD21-2	0.0483806	0.410428	0.390994	1.587	0	0.329486	0.358855	1.17929	0.206737	0.244971	0.441717	1.48961	0.356484	0.101352	0.249815	0	0.279845	0.175904	0.529288	2.41472
4	GhRD19-5	9.07479	15.8358	23.9303	47.4544	8.70526	18.8078	34.8532	32.0965	16.4218	24.719	32.4356	34.3332	15.9065	14.2946	10.0434	11.5677	15.584	27.4313	28.1056	43.4399
5	GhSAG12-1	0	0	0	0.560386	0	0.112074	0.30098	3.4304	0	0	1.06215	0.506116	0	0.088837	0	0	0.0805628	0	0.440332	0.218789
6	GhSAG12-2	0	0.19409	0	0.986404	0	0	0	0.141608	0	0	0	2.02155	0.168379	0.0980406	0	0	0.177391	0	0.389363	6.70229
7	GhSAG12-3	0	0	0	0.102943	0	0	0	0	0.213916	0	0.0969613	0.18527	0	0	0	0	0	0	0	0.133913
8	GhXCP1	5.88685	5.01691	6.11138	6.86244	1.03824	2.78036	6.13914	8.0253	8.7003	8.07507	4.69336	2.54528	10.6069	10.123	4.40938	3.74011	4.12298	5.37151	3.2644	4.66531
9	GhALP4	0.496428	3.1208	2.26261	3.08586	1.03203	1.35047	2.07898	2.40739	4.38473	2.46131	1.91558	2.70821	3.70251	3.04928	1.10707	0.937775	2.19561	2.19728	1.36252	2.51592
10	GhSAG12-4	0	0	0	0.100473	0	0	0	0	0	0	0.0959209	0	0	0	0	0	0	0	0.0793525	0
11	GhSAG12-5	0	0	0	0	0	0	0	0	0	0.125562	0	0	0	0	0.383142	0	0	0	0	0
12	GhXBCP3-2	3.87604	4.4981	3.41413	12.0729	2.20574	7.28399	9.31063	9.5552	5.65364	4.3896	5.55043	12.0597	4.61619	3.86381	3.95263	5.72074	4.98795	5.1446	3.77674	13.1543
13	GhRD21-3	24.6974	70.6623	107.103	127.148	13.5925	52.5221	127.203	81.9626	35.3859	58.626	142.562	132.695	29.5309	22.6703	8.19852	13.0221	29.0512	97.7463	120.576	152.645
14	GhTHI1	0	0	0	0.198493	0	0.194296	0	0	0	0.0597575	0	0	0	0	0	0	0	0	0	0
15	GhSAG12-7	0	0	0.144929	0	0.119604	0	0	0	0	0	0	0	0	0	0	0	0	0	0	0
16	GhSAG12-8	0.0728982	0	0	0	0	0	0	0	0	0.0614107	0	0	0	0	0	0	0	0	0.0780375	0
17	GhRD21-4	2.31324	2.50363	3.95901	0.346938	0.41411	1.63545	2.77081	1.99805	1.21628	1.13557	0.323488	0.619904	0.0468042	0.2131	0.648776	1.14829	0.976423	0.604874	2.60508	0.992917
18	GhALP2	76.415	234.972	564.282	300.157	31.8981	206.57	381.789	379.108	135.473	440.164	771.151	337.304	103.302	135.323	60.7314	67.9288	102.07	369.852	653.359	330.191
19	GhXBCP3-3	60.5986	68.162	40.626	202.348	21.8387	42.7468	50.0097	109.621	86.2889	60.7951	32.6039	67.5549	103.935	84.5362	51.8595	33.1997	86.4993	64.4532	28.3233	216.172
20	GhSAG12-10	0	0.606823	0	1.31762	0.328352	0.799845	0.732159	6.24316	0.839877	0.247553	1.40669	3.74882	0.268232	0.314174	0.513319	0.512762	0.36913	0.340158	0.313494	9.25918
21	GhSAG12-12	0	0	0	0	0	0	0	0	0	0.0735658	0	0	0	0.186408	0	0	0	0	0	0
22	GhRD19-7	0	0	0.127789	0	0	0	0	0	0	0	0	0	0	0	0	0	0	0	0	0
23	GhCTB1	1.38597	1.60715	8.82752	6.82137	1.47379	4.17622	7.57915	7.3674	1.19859	2.59495	6.85302	7.25077	1.15891	0.742255	2.34326	2.57561	1.07865	5.01068	8.30751	7.7875
24	GhCTB2	2.2883	2.77596	3.45276	27.6781	0.796692	5.38494	22.1173	49.391	3.08273	2.93424	6.84002	17.5993	1.35019	2.28045	1.79223	1.6496	2.13102	2.64809	5.60867	23.6891
25	GhRD21-5	2.67684	8.20087	5.46182	100.263	0.646759	5.52246	16.0107	34.6132	2.86664	4.83718	6.70932	9.85679	4.17997	3.29512	0.346225	0.531639	3.5046	7.52665	3.14944	54.9707
26	GhXCP2	7.97854	5.57012	5.07003	5.68939	1.25609	4.93047	4.96433	6.71288	10.3019	8.09191	3.78146	4.83001	9.43865	8.5548	3.73613	2.6253	4.32633	7.53386	2.09452	5.25404
27	GhRD21-6	34.598	31.7525	29.2656	71.2943	16.5187	32.2944	32.385	64.9324	34.7258	27.9224	17.7148	36.8188	45.7838	51.5182	26.1517	14.6489	38.4666	22.3619	20.9536	59.5723
28	GhCEP3	0.0786082	0	0	0	0	0.212854	0.143236	0	0.339351	0.199864	0	0.0967734	0	0.0843418	0	0	0	0	0	0.277518
29	GhCEP4	0.0673998	0	0	0.0943267	0	0.368371	0.125443	0	0	0	0.0883559	0.0842908	0	0.145038	0	0.269989	0.132278	0.164135	0.0730068	0.184367
30	GhRD19-1	17.4553	30.7011	26.2739	111.28	12.0375	39.7241	34.5253	71.1756	25.4498	29.361	41.4587	67.4307	29.5915	33.0675	8.84349	14.2207	23.5675	28.6196	22.2012	78.3537
31	GhALP6	2.0352	3.83099	21.4616	15.1198	1.2261	3.43192	42.2365	55.6544	5.31058	12.1895	36.7889	27.2504	4.56202	8.70782	2.16359	6.01152	3.27178	8.73722	25.5768	14.7399
32	GhRD21-7	70.5575	192.01	372.959	441.934	20.9185	136.457	329.426	365.205	120.281	287.486	581.018	335.297	66.1487	59.2913	40.7643	44.489	90.1999	263.98	500.963	508.033
33	GhRD19-3	224.579	490.498	941.597	949.985	131.678	509.033	1049.31	854.172	324.461	794.636	1306.3	1082.32	133.983	199.382	117.094	196.197	244.962	701.303	1139.37	902.065
34	GhRD21-8	0.0364858	0.151013	0.223342	1.11762	0.0592412	0.0983284	0.066618	0.497718	0.051827	0.151941	0.373799	0.848982	0.10181	0.192411	0.187361	0.147182	0.035839	0.267005	0.118389	0.918396
35	GhRD19-4	13.8026	18.7259	25.1529	60.3713	7.3238	23.2033	34.9883	46.133	19.5359	28.6088	34.2787	52.7027	15.2409	18.5158	8.02394	14.6686	18.5633	33.4348	40.1759	55.9223
36	GhCEP5	1.42634	0.285757	0.542431	1.50364	0.112207	0.184123	0	0.105876	0.877492	0.28605	0.176698	0.338565	0.758419	0.218288	0.531947	0.633874	0.661591	0.574614	0.219326	0.551768
37	GhSAG12-13	0	0	0	0	0	0	0	0	0.104668	0	0	0	0.0675462	0.156118	0.189711	0	0	0	0	0.0651091
38	GhSAG12-15	0	0	0	0.200713	0	0	0	0	0	0.0619223	0	0	0	0.158267	0	0	0	0	0	0
39	GhSAG12-16	0	0	0	0	0	0	0	0	0	0.126215	0	0	0	0	0	0	0.0713273	0	0	0
40	GhSAG12-17	0	0	0.147235	0.0999546	0	0	0	0	0.104959	0	0	0.0904468	0	0	0.190182	0	0	0	0	0
41	GhTHI2	0.1875	0.700022	1.13479	1.59607	0.119244	1.20426	2.29514	1.74341	0.211811	0.37288	0.95036	1.68166	0.243142	0.235532	0.190166	0.34959	0.331593	0.546857	0.763319	3.2265
42	GhXCP3	9.47565	13.3552	8.76866	11.7422	2.24061	7.54329	10.4436	12.3508	19.4142	15.1681	8.47216	11.3662	16.0355	15.8891	6.94745	8.57256	9.78594	10.9607	4.59162	11.1486
43	GhALP3	2.22064	3.32969	5.5591	3.63759	1.44392	4.0016	3.18016	6.23059	6.35995	6.11434	4.58735	3.74348	3.78748	2.44632	1.86688	1.62663	4.22273	3.62349	3.17469	2.76228
44	GhSAG12-26	0	0	0	0	0	0	0	0	0	0	0	0	0	0.235954	0	0	0	0	0	0.0653769
45	GhRD19-6	18.9589	38.4483	37.6902	21.4809	6.30923	35.8751	23.828	22.7061	18.9917	55.4309	53.1961	22.9245	11.565	21.3226	10.3476	20.0091	16.7846	59.8199	47.2799	15.6629
46	GhXBCP3-4	2.58229	3.77376	4.60145	13.4588	1.5237	5.34811	9.64889	10.4865	2.59026	3.48903	4.4309	12.8698	1.84039	2.73897	0.990085	1.75577	3.26101	4.0987	4.11285	15.4572
47	GhRD21-9	9.65221	22.7427	28.4614	56.0443	6.38391	15.5873	44.5624	39.7359	14.4768	22.3115	43.6455	54.7491	12.2157	9.7472	5.45085	7.309	11.6723	28.8944	32.6989	42.0884
48	GhSAG12-18	0	0	0	0	0	0	0.144411	0	0	0.133265	0	0	0	0	0	0	0	0	0	0
49	GhSAG12-19	0	0	0	0	0	0	0	0	0	0.0617104	0	0	0.0679501	0.0785235	0	0	0	0	0	0
50	GhSAG12-21	0	0.472747	0.302491	5.21881	0	0.102371	0.83711	1.29353	0.108024	0.0634571	0.393364	1.68743	0	0.161504	0	0	0.0731197	0.544321	0.242696	8.44549
51	GhSAG12-22	0	0	0	0	0	0.120255	0	0.136508	0	0	0	0.108469	0	0	0	0	0	0	0	0
52	GhSAG12-23	0.0735095	0	0.297696	1.52504	0	0	0.693991	1.3839	0	0	1.0757	0.461501	0.0682106	0	0.193882	0.0979556	0	0	0.322413	1.85876
53	GhSAG12-24	0.073816	0	0.877332	3.26002	0.120605	0	5.56042	4.04064	0	0.123743	7.63809	2.1196	0	0.0792876	0	0.0979696	0	0.0882474	2.04856	5.30223
54	GhSAG12-25	0.149398	0.317524	0.452106	1.01686	0.376541	0.411108	0.279622	0.463764	0	0.320197	0.0982381	1.11125	0.970643	0.723416	0.392693	0.397553	0.575633	0.626199	0.243295	2.39459
55	GhRD21-11	0	0.11323	0.552016	0	0	0.14723	0	0.167803	0	0.227236	0	0	0	0	0.422086	0	0.0533951	0	0.352157	0
56	GhALP5	71.0991	276.502	719.486	562.624	42.4872	325.649	736.973	831.136	160.393	537.233	1107.1	528.692	74.5211	102.93	44.5197	190.635	108.672	548.9	997.175	578.945
57	GhXBCP3-1	57.6181	68.0397	40.3012	228.764	24.3548	54.6339	59.3706	133.144	78.8549	53.999	34.0573	83.6146	109.699	86.0615	46.8075	33.339	70.4674	46.4716	27.5397	209.184
58	GhRD19-8	0	0.136259	0.131144	0.713898	0	0.0885882	0.119016	0	0	0.165207	0.167227	0.160131	0.0610195	0.418877	0.337829	0.0868407	0	0.158463	0	0.348024
59	GhSAG12-27	0	0	0	0	0	0	0	0	0	0	0	0	0	0	0.189497	0	0.0715025	0.0890658	0	0
60	GhRD19-9	0	0	0	0	0	0	0	0	0.0914109	0	0	0	0.177734	0	0	0	0	0	0	0.0566363
61	GhCTB3	7.00373	20.3604	53.2924	65.2992	8.02059	33.8953	67.7667	86.4396	9.79203	25.9329	65.5866	98.4915	13.11	14.7899	8.66574	8.19975	9.27573	25.1544	54.3917	80.7634
62	GhCTB4	3.10488	8.26656	14.7906	30.4129	1.6022	10.0494	25.8152	40.053	4.45248	7.62254	21.6957	31.9556	3.47863	3.95743	2.75013	2.72622	3.77999	9.60689	18.2923	36.6197
63	GhRD21-10	2.97254	13.7398	11.1643	174.39	1.556	12.8247	28.3745	67.8627	3.04079	9.10217	12.9357	23.8526	6.07819	4.52682	2.77055	1.15042	5.77569	13.7547	7.1095	101.401
64	GhXCP4	3.33397	1.33254	1.40496	2.39465	0.662341	1.57783	2.33697	2.31226	2.66119	2.73584	1.49279	2.21258	2.06381	4.34046	1.80781	1.24607	1.53713	2.4588	1.25264	1.81381
65	GhRD21-12	20.1751	20.2107	24.1765	50.8503	13.2418	30.4858	32.0148	57.3848	33.176	17.5703	12.7859	26.1904	39.442	36.4361	18.0239	9.86893	34.7416	18.5823	19.2397	46.9055
66	GhCEP2	0	0.167205	0	0	0	0	0	0	0	0	0	0.0965817	0	0	0.203223	0	0	0	0	0
67	GhCEP6	0	0	0.136788	0	0.110846	0.0920929	0.125443	0	0.388697	0.171009	0.265068	0.505745	0	0.0725189	0	0.0899962	0.0661391	0.328269	0.0730068	0.307279
68	GhRD19-10	23.6515	58.8563	54.1948	239.337	14.1856	53.9456	49.1114	115.512	38.852	48.1417	59.5953	116.2	47.529	52.5628	16.4489	19.4406	38.764	57.4415	47.7848	161.165
69	GhALP1	3.3278	9.92241	90.0023	123.184	2.62414	17.5403	144.537	195.962	9.00409	26.0668	157.787	163.689	3.886	8.73929	3.26999	10.2697	4.14762	24.2975	121.812	124.291
70	GhSAG12-29	0	0	0	0	0	0	0	0	0	0.061617	0	0	0	0	0	0	0	0	0	0
71	GhSAG12-30	1.50258	7.39433	50.6744	514.381	0.888165	8.59024	189.58	153.557	2.71538	5.02994	216.999	745.558	2.08833	4.99808	0.985622	8.09809	3.48212	14.1459	75.3322	933.159

## Sheet: Supplementary table 9
SupplementaryTable 9 PLCP genes under V. dahliae inoculation in G. hirsutum expression data
Number	Nomenclature	Y6m-FPKM	Y6v-FPKM	Y12m-FPKM	Y12v-FPKM	Y24m-FPKM	Y24v-FPKM
1	GhRD21-1	26.15	29.93	23.69	30.64	58.14	51.78
2	GhCEP1	0.48	1.3	0.21	0.001	0	0
3	GhRD21-2	2.94	1.97	0.97	1.98	2.38	1.84
4	GhRD19-5	15.31	20.61	6.87	8.83	13.35	16.91
5	GhSAG12-2	0	0	0	0	1.11	0.001
6	GhSAG12-3	0.001	2.1	0	0	0	0
7	GhXCP1	4.69	11.01	3.34	2.17	1.5	1.9
8	GhALP4	3.48	6.68	2.19	1.61	2.3	0.83
9	GhSAG12-4	0.001	1.38	0	0	0	0
10	GhXBCP3-2	1.2	3.8	0.001	0.58	0.37	0.001
11	GhRD21-3	251.21	290.08	171.87	218.41	172.72	137.22
12	GhSAG12-28	0	0	0.001	1.66	0	0
13	GhSAG12-7	0	0	0.001	0.23	0	0
14	GhSAG12-9	0	0	0.001	0.23	0	0
15	GhRD21-4	5.3	20.84	7	7.75	2.45	0.95
16	GhALP2	11.67	3.44	4.79	9.51	10.9	13.79
17	GhXBCP3-3	8.43	14.74	12.01	14.95	13.84	19.33
18	GhSAG12-10	0	0	0.001	0.68	0	0
19	GhRD19-2	0.001	0.62	0.82	4	0.86	0.77
20	GhSAG12-11	0	0	0.9	0.83	0.001	0.43
21	GhSAG12-12	0.001	2.33	0	0	0	0
22	GhCTB1	3.05	5	0.64	8.34	7.09	3.4
23	GhCTB2	0.49	0.66	0	0	2.29	2.89
24	GhRD21-5	0.48	0.001	0.84	0.001	1.32	0.8
25	GhXCP2	2.96	9.67	0.37	2.05	0.59	0.71
26	GhRD21-6	0.93	1.25	1.23	1.51	3.45	1.95
27	GhCEP3	0	0	0.47	0.001	0	0
28	GhCEP4	7.4	15.59	10.02	6.05	5.8	5.9
29	GhRD19-1	12.05	7.47	11.94	12.66	20.05	15.86
30	GhALP6	1.97	0.83	2.36	1.05	0	0
31	GhRD21-7	52.31	47.32	56.87	83.95	90.28	102.9
32	GhRD19-3	11.82	7.62	10.67	19.38	35.07	36.73
33	GhRD21-8	0.001	0.38	0.001	0.62	0	0
34	GhRD19-4	34.7	19.57	19.08	14.37	17.8	11.99
35	GhCEP5	0	0	0.21	0.001	1.35	0.001
36	GhSAG12-13	0.001	2.06	0	0	0	0
37	GhSAG12-15	0	0	0.001	0.03	0	0
38	GhSAG12-17	0	0	0.001	0.03	0	0
39	GhTHI2	0.001	1.11	0	0	0	0
40	GhXCP3	8.74	4.36	4.99	5.88	3.57	3.92
41	GhALP3	1.01	0.001	0.45	1.09	0	0
42	GhRD19-6	0.44	0.001	1.96	2.4	9.87	9.28
43	GhXBCP3-4	1.23	0.001	1.43	1.16	2.99	2.03
44	GhRD21-9	76.31	52.47	57.37	75.33	64.61	47.18
45	GhSAG12-20	0	0	0	0	0.48	0.001
46	GhSAG12-21	0.001	0.62	0	0	0	0
47	GhSAG12-22	0	0	0	0	0.001	0.98
48	GhSAG12-23	0.001	0.08	0.001	2.24	0	0
49	GhRD21-11	0	0	0	0	0.37	0.001
50	GhALP5	7.07	17.09	9.55	13.36	22.88	41.84
51	GhXBCP3-1	17.45	16.72	9.86	6.16	16.58	13.4
52	GhRD19-8	0.46	0.001	0	0	0.001	0.39
53	GhSAG12-27	4.1	1.38	0.001	0.83	0	0
54	GhRD19-9	0.001	0.61	0	0	0	0
55	GhCTB3	6.81	13.54	8.5	9.17	13.88	15.56
56	GhCTB4	2.47	3.98	0.001	1.07	3.19	1.22
57	GhRD21-10	0.48	0.001	0.84	0.001	0	0
58	GhXCP4	0	0	0.37	2.05	0.59	0.71
59	GhRD21-12	1.41	1.26	0.41	0.51	1.74	0.001
60	GhCEP2	0	0	0.47	0.001	0	0
61	GhCEP6	2.24	9.02	7.4	13.71	8.03	3.36
62	GhRD19-10	21.23	25.9	24.82	16.16	32.02	42.11
63	GhALP1	9.87	2.48	2.85	1.61	4.11	5.77
64	GhSAG12-29	0	0	0.001	0.03	0	0
